1 **Role of the *Escherichia coli* ubiquinone-synthesizing UbiUVT pathway in**  
2 **adaptation to changing respiratory conditions**

3

4 Arias-Cartin Rodrigo<sup>1\*</sup>, Kazemzadeh Ferizhendi Katayoun<sup>2\*</sup>, Séchet Emmanuel<sup>1\*</sup>, Pelosi  
5 Ludovic<sup>2</sup>, Loeuillet Corinne<sup>3</sup>, Pierrel Fabien<sup>2</sup>, Barras Frédéric<sup>1#</sup> and Bouveret Emmanuelle<sup>1#</sup>

6

7 <sup>1</sup> Institut Pasteur, Département de Microbiologie, Université Paris-Cité, UMR CNRS 6047,  
8 SAME Unit, Institut Pasteur, France.

9 <sup>2</sup> Univ. Grenoble Alpes, CNRS, UMR 5525, VetAgro Sup, Grenoble INP, TIMC, 38000  
10 Grenoble, France.

11 <sup>3</sup> Univ. Grenoble Alpes, INSERM U1209, CNRS UMR 5309, Institute for Advanced Biosciences,  
12 Team Genetics Epigenetics and Therapies of Infertility, 38000 Grenoble, France.

13

14

15 \* All three authors contributed equally to this work and their names appear in alphabetical  
16 order

17

18 # co-corresponding authors: fbarras@pasteur.fr ; emmanuelle.bouveret@pasteur.fr

19

20 This study is dedicated to the memory of our friend and colleague Professor Josep  
21 Casadesús.

22

23

24

25 **Keywords :** quinone – *E. coli* – Fnr – respiration - UbiTUV

26 **ABSTRACT**

27

28 Isoprenoid quinones are essential for cellular physiology. They act as electron and proton  
29 shuttles in respiratory chains and in various biological processes. *Escherichia coli* and many  
30  $\alpha$ ,  $\beta$ , and  $\gamma$  proteobacteria possess two types of isoprenoid quinones: ubiquinone (UQ) is  
31 mainly used under aerobiosis, while (demethyl)menaquinones ((D)MK) are mostly used  
32 under anaerobiosis. Yet, we recently established the existence of an anaerobic O<sub>2</sub>-  
33 independent UQ biosynthesis pathway controlled by *ubiT*, *ubiU*, and *ubiV* genes. Here, we  
34 characterize the regulation of *ubiTUV* genes in *E. coli*. We show that the three genes are  
35 transcribed as two divergent operons that are both under the control of the O<sub>2</sub> sensing Fnr  
36 transcriptional regulator. Phenotypic analyses using a *menA* mutant devoid of (D)MK  
37 revealed that UbiUV-dependent UQ synthesis is essential for nitrate respiration and for  
38 uracil biosynthesis under anaerobiosis, while it contributes, though modestly, to bacterial  
39 multiplication in the mouse gut. Moreover, we showed by genetic study and <sup>18</sup>O<sub>2</sub> labelling  
40 that UbiUV contribute to hydroxylation of ubiquinone precursors through a unique O<sub>2</sub> -  
41 independent process. Last, we report a crucial role of *ubiT* in allowing *E. coli* to shift  
42 efficiently from anaerobic to aerobic conditions. Overall, this study uncovers a new facet of  
43 the strategy used by *E. coli* to adjust its metabolism upon changing O<sub>2</sub> levels and respiratory  
44 conditions. This work links respiratory mechanisms to phenotypic adaptation, a major driver  
45 in the capacity of *E. coli* to multiply in gut microbiota, and of facultative anaerobic pathogens  
46 to multiply in their host.

47

48 **ABSTRACT IMPORTANCE**

49 Enterobacteria multiplication in the gastrointestinal tract is linked to microaerobic  
50 respiration and associated to various inflammatory bowel diseases. Our study focuses on  
51 biosynthesis of ubiquinone (UQ), a key player in respiratory chains, under anaerobiosis. The  
52 importance of this study stems from the fact that UQ usage was for long considered to be  
53 restricted to aerobic conditions. Here we investigated the molecular mechanism allowing UQ  
54 synthesis in the absence of O<sub>2</sub> and searched for the anaerobic processes that UQ is fueling in  
55 such conditions. We found that UQ biosynthesis involves anaerobic hydroxylases, i.e.  
56 enzymes able to insert a O atom in the absence of O<sub>2</sub>. We also found that anaerobically  
57 synthesized UQ can be used for respiration on nitrate and synthesis of pyrimidine. Our  
58 findings are likely to be applicable to most facultative anaerobes, which count many  
59 pathogens (*Salmonella*, *Shigella*, *Vibrio*) and will help in unravelling microbiota dynamics.

60

## 61 INTRODUCTION

62 Isoprenoid quinones are widely distributed in the three domains of life and globally act as  
63 electron and proton carriers (1). They serve in many processes of bacterial physiology and  
64 electron transport chains like photosynthesis, e.g. plastoquinone and phylloquinone, and  
65 respiration, e.g. ubiquinone (UQ) and menaquinone (MK) (2). Isoprenoid quinones are  
66 composed of a quinone ring and a poly-isoprenoid side chain whose length varies between  
67 organisms (for instance UQ<sub>8</sub> in *Escherichia coli* and UQ<sub>9</sub> in *Pseudomonas aeruginosa*). Many  
68 proteobacteria, such as *E. coli*, produce two main types of quinones: benzoquinones,  
69 represented by UQ, and naphthoquinones, such as MK and demethyl-menaquinone (DMK).  
70 In respiratory chains, quinones transfer electrons from primary dehydrogenases to terminal  
71 reductases. For decades, *E. coli* aerobic and anaerobic respiratory chains were thought to  
72 rely on UQ and MK/DMK, respectively. Yet, we have recently discovered a new pathway for  
73 UQ biosynthesis under anaerobiosis, opening the way to a more complex and redundant  
74 model for bacterial respiratory metabolism (3).

75         Aerobic UQ biosynthesis pathway includes 9 steps (4) (Figure S1). It begins with the  
76 conversion of chorismate to 4-hydroxybenzoate (4HB) by the chorismate lyase UbiC. Then,  
77 the phenyl ring of the 4HB precursor undergoes condensation with a 40-carbon long  
78 isoprenoid chain in a reaction catalyzed by the UbiA enzyme. Subsequently, a series of  
79 modifications on the 4HB ring by two methylases (UbiE and UbiG), a two-component  
80 decarboxylase (UbiD, UbiX), and three hydroxylases (UbiI, UbiH and UbiF) generate the final  
81 UQ<sub>8</sub> product. The FAD-monooxygenases UbiI, UbiH, and UbiF use molecular O<sub>2</sub> for their  
82 hydroxylation reaction (5–7). An atypical kinase-like protein called UbiB is also involved in  
83 UQ<sub>8</sub> synthesis, but its exact role remains elusive (8). In addition, two non-enzymatic factors  
84 are required, UbiJ and UbiK, which may allow UbiI-EFGH enzymes to assemble in a  
85 cytoplasmic 1 MDa complex, referred to as the Ubi metabolon (9). Also, UbiJ and UbiK bind  
86 lipids, which may help the hydrophobic UQ biosynthesis to proceed inside a hydrophilic  
87 environment.

88         Anaerobic UQ biosynthesis is formed by a subset of the enzymes of the aerobic  
89 pathway, namely UbiA, UbiB, UbiC, UbiD, UbiE, UbiG and UbiX, that function with UbiT,  
90 UbiU, and UbiV proteins solely required under anaerobiosis (3) (Figure S1). Like its homolog  
91 counterpart UbiJ, UbiT contains a SCP2 lipid-binding domain. Strikingly, UbiU and UbiV do

92 not exhibit any sequence similarity or functional relatedness with the hydroxylases UbiI,  
93 UbiH, or UbiF. UbiU and UbiV each contain an iron-sulfur ([4Fe-4S]) cluster coordinated by  
94 four conserved cysteine residues embedded in the so-called protease U32 domain, and they  
95 form a soluble UbiUV complex (3). Interestingly, two other members of the U32 protein  
96 family, RlhA and TrhP, are involved in hydroxylation reactions. They introduce specific  
97 nucleotide modifications respectively in the 23S rRNA or in some tRNAs (10–12).

98 In this work, we aimed at identifying the conditions under which UbiUVT proteins are  
99 produced and the genetic regulatory mechanisms involved, and the physiological role of  
100 UbiTUV. We concluded that (i) thanks to Fnr control, UbiUV ensure the production of UQ  
101 under a range of O<sub>2</sub> levels, from anaerobiosis to microaerobiosis, (ii) a dual  
102 anaerobic/aerobic regulation allows UbiT to secure a rapid shift from anaerobic UbiUV-  
103 dependent UQ synthesis to an aerobic UbiIHF-dependent UQ synthesis, and (iii) UbiUV-  
104 synthesized UQ can be used for nitrate respiration and anaerobic pyrimidine biosynthesis.  
105 We also showed that UbiUV act as O<sub>2</sub>-independent hydroxylases paving the way for future  
106 studies towards the characterization of a new type of chemistry.

107

## 108 RESULTS

109

### 110 1. Biochemical function of UbiUV *in vivo*

111 To get further insight into the UbiUVT system *in vivo*, we tested whether overproduction of  
112 UbiU and UbiV could substitute for the three oxygen-dependent hydroxylases UbiI, UbiH, or  
113 UbiF. Thus, we cloned the *ubiUV* operon in the pBAD24 vector downstream the arabinose  
114 inducible pBAD promoter (pES154 plasmid). In parallel, we also cloned *ubiUV* upstream the  
115 SPA tag encoding sequence in order to assess the quantities of proteins produced. The  
116 pBAD-*ubiUV*-SPA plasmid produces a level of UbiV protein approximately 30-fold higher to  
117 that produced by a chromosomal copy of *ubiV-SPA* under anaerobiosis (Figure S2). After  
118 transformation of mutant strains, selection, and precultures with LB medium in absence of  
119 O<sub>2</sub>, growth on M9 succinate was tested as it strictly depends upon an aerobic UQ-dependent  
120 respiratory chain (Figure 1). In the presence of inducer, the pES154 plasmid was able to  
121 suppress the growth phenotype of the  $\Delta ubiF$ ,  $\Delta ubiH$ ,  $\Delta ubiIK$ , and  $\Delta ubiIHF$  mutants (Figure  
122 1A). Note that as a control, we used the *Neisseria meningitidis ubiM* gene that we previously  
123 showed to substitute for the growth phenotype of a  $\Delta ubiIHF$  mutant (13). Also, in M9  
124 succinate, the  $\Delta ubiI$  mutation alone has no growth phenotype and needs to be combined  
125 with  $\Delta ubiK$  mutation for a defect to be observed (14). To test the importance of the UbiU-  
126 bound [Fe-S] cluster, a complementation test was carried out in the same conditions, using a  
127 pBAD derivative carrying the *ubiU*(C176A) allele that produces an UbiU variant lacking its  
128 [Fe-S] cluster (3). Accordingly, suppression of  $\Delta ubiH$ ,  $\Delta ubiF$ ,  $\Delta ubiIK$ , and  $\Delta ubiIHF$  was no  
129 longer observed (Figure 1A). In addition, the pES154 plasmid was unable to suppress the  
130 growth phenotype of  $\Delta ubiA$ ,  $\Delta ubiD$ ,  $\Delta ubiE$ , or  $\Delta ubiG$  strains (data not shown), and was also  
131 unable to suppress the growth phenotype of  $\Delta ubiH\Delta ubiA$  or  $\Delta ubiH\Delta ubiD$  mutants (Figure  
132 1B), showing that UbiUV intervene specifically at the hydroxylation steps and otherwise  
133 depend upon all the other components of the aerobic UQ biosynthesis pathway to do so.  
134 These results indicate that in the presence of O<sub>2</sub>, expression of UbiUV can substitute for the  
135 O<sub>2</sub>-dependent UbiIHF hydroxylases and that integrity of the UbiU [Fe-S] cluster is required.

136 Remarkably, expression of the pES154 plasmid was also able to suppress growth  
137 defects of the  $\Delta ubiJ$  mutant (Figure 2A). UbiJ is an auxiliary factor important for organizing  
138 the aerobic Ubi metabolon. We reasoned that suppression was made possible thanks to the

139 presence of the chromosomally encoded UbiT that shares sequence similarity with UbiJ. To  
140 test this, we repeated the complementation test in two new strains,  $\Delta ubiH\Delta ubiJ$  and  
141  $\Delta ubiH\Delta ubiT$ . The pES154 plasmid still complemented growth defects of the  $\Delta ubiH\Delta ubiJ$   
142 mutant, but it was unable to complement the  $\Delta ubiH\Delta ubiT$  mutant (Figure 2B). Similarly,  
143 pES154 was found to suppress the growth defect phenotype of a  $\Delta ubiF\Delta ubiJ$  mutant but not  
144 a  $\Delta ubiF\Delta ubiT$  mutant (Figure 2C). These results showed that in the presence of O<sub>2</sub>, increased  
145 dosage of *ubiUV* genes suppresses the lack of O<sub>2</sub>-dependent hydroxylases UbiF and UbiH in  
146 an UbiT-dependent/UbiJ-independent manner.

147 To confirm that phenotypic suppression was due to UQ<sub>8</sub> synthesis, we quantified the  
148 UQ<sub>8</sub> content by HPLC analysis coupled to electrochemical detection (ECD) for all strains  
149 described above (Figure 3A). Results showed that mutant strains lacking UbiI-UbiK, UbiH  
150 and/or UbiF were severely deficient in UQ. The pES154 plasmid enabled  $\Delta ubiH$ ,  $\Delta ubiF$ , or  
151  $\Delta ubiIH$  strains to synthesize 30-50% of the UQ level of the wild-type (wt) strain (Figure 3A, 1<sup>st</sup>  
152 panel). The levels of UQ obtained in the  $\Delta ubiIH\Delta ubiF$  and  $\Delta ubiIK$  mutant strains with the  
153 pES154 plasmid were much lower. We stress that the UQ levels cannot be directly correlated  
154 with the phenotypic analysis (Figures 1-2) since culture media were different (LB vs M9  
155 succinate) to allow recovery of enough biological material for the HPLC-ECD analyses.  
156 Importantly, the pBAD-*ubiU(C176A)V* plasmid was unable to promote UQ synthesis in  $\Delta ubiH$   
157 (Figure 3A, 2<sup>nd</sup> panel). Last, UQ<sub>8</sub> content assay confirmed that UbiT, but not UbiJ, was  
158 necessary for UbiUV to synthesize UQ in aerobic conditions (Figure 3A, 3<sup>rd</sup> panel).

159 The results above showed that UbiUV hydroxylate UQ precursors, when expressed  
160 under aerobic conditions. This result raised the possibility that under such conditions, O<sub>2</sub>  
161 might be used as a co-substrate of the hydroxylation reactions, as is the case for UbiI, UbiH  
162 and UbiF in wt cells (5). To test this hypothesis, we exposed cells to <sup>18</sup>O<sub>2</sub> and monitored the  
163 labelling of UQ by HPLC-ECD-MS. Two hours after <sup>18</sup>O<sub>2</sub> addition, the level of UQ<sub>8</sub> increased in  
164 both strains (Figure 3B). Before adding <sup>18</sup>O<sub>2</sub>, the mass spectra of UQ synthesized by wt or  
165  $\Delta ubiIH\Delta ubiF$  cells containing pES154 displayed H<sup>+</sup> and NH<sub>4</sub><sup>+</sup> adducts with m/z ratio  
166 characteristic of unlabeled UQ (Figure 3C and D). As expected, two hours after adding <sup>18</sup>O<sub>2</sub>,  
167 most of the UQ<sub>8</sub> pool in wt cells contained three <sup>18</sup>O<sub>2</sub> atoms (Figure 3E), in agreement with  
168 O<sub>2</sub> being the co-substrate of the aerobic hydroxylation steps (5). In contrast, we detected  
169 only unlabeled UQ<sub>8</sub> in the  $\Delta ubiIH\Delta ubiF$  strain expressing UbiUV (Figure 3F), demonstrating

170 that UbiUV utilize another oxygen donor than O<sub>2</sub>, even when operating under aerobic  
171 conditions.

172 Altogether, both phenotypic and UQ<sub>8</sub> quantification results allowed us to conclude  
173 that UbiU and UbiV, when produced in sufficiently high-level, function in the canonical  
174 “aerobic” UQ<sub>8</sub> biosynthesis pathway by catalyzing [Fe-S]-dependent hydroxylation of the  
175 benzene ring in an O<sub>2</sub>-independent reaction. Remarkably, UbiT is necessary for such aerobic  
176 UbiUV-mediated synthesis to occur and cannot be substituted by UbiJ.

177

## 178 **2. The ISC [Fe-S] biogenesis machinery is required for anaerobic UQ biosynthesis**

179 The UbiU and UbiV proteins each contain a [4Fe-4S] cluster, which is essential to the  
180 synthesis of UQ in anaerobic conditions (3). Assembly of [4Fe-4S] clusters requires complex  
181 biosynthetic machineries, ISC and SUF (15). Therefore, the UQ<sub>8</sub> levels were monitored in  $\Delta$ *isc*  
182 and  $\Delta$ *suf* mutants grown in anaerobic conditions (Figure S3). In addition to UQ<sub>8</sub>, the  
183 quantification of DMK<sub>8</sub> and MK<sub>8</sub> was also performed. UQ<sub>8</sub> content in  $\Delta$ *isc* mutants was  
184 strongly impaired (around 15% of the wt), and was much less affected in  $\Delta$ *suf* mutants (60-  
185 80% of the wt). DMK and MK content remained mostly unaltered. Collectively, these results  
186 showed that ISC and SUF systems are not involved in DMK and MK biosynthesis and that the  
187 ISC system is the most relevant in UQ<sub>8</sub> biosynthesis likely through the maturation of [4Fe-4S]  
188 clusters in UbiU and UbiV.

189

## 190 **3. Anaerobic and micro-aerobic UQ biosynthesis**

191 Genome scale studies have predicted that *ubiUV* genes are under the control of the  
192 anaerobic Fnr transcriptional activator (16, 17). In contrast, *ubiT* did not appear as a  
193 potential Fnr target. This prompted us to investigate the effect of anaerobiosis (0% O<sub>2</sub>),  
194 microaerobiosis (0.1% O<sub>2</sub>), and aerobiosis (21% O<sub>2</sub>) on the level of UbiU, UbiV, and UbiT  
195 proteins. In order to follow the quantity of UbiTUV proteins in physiological conditions, we  
196 constructed a series of recombinant strains producing the UbiT, UbiU, or UbiV proteins with  
197 a C-terminal SPA tag (18) encoded from a gene fusion at their chromosomal loci. We  
198 examined protein production by Western Blot assay using an anti-flag antibody and assessed  
199 loading with a polyclonal antibody against YbgF (CpoB). All three UbiTUV-SPA tagged  
200 proteins were present in strains grown in anaerobiosis (Figure 4A) and microaerobiosis  
201 (Figure 4B). In aerobiosis, production of UbiU and UbiV was no longer observed whereas a



202 significant level of UbiT was still visible. The contribution of Fnr to anaerobiosis- or  
203 microaerobiosis-mediated activation of *ubiU* and *ubiV* genes was confirmed as no cognate  
204 UbiU or UbiV associated band was observed in a  $\Delta fnr$  mutant (Figure 4A-B). Interestingly,  
205 UbiT level was also reduced in the  $\Delta fnr$  mutant in  $-O_2$ . Last, in order to validate the  
206 physiological significance of the Fnr regulatory circuit depicted above, we quantified the  
207 amount of UQ<sub>8</sub> produced in wt and  $\Delta fnr$  strains, during aerobiosis and anaerobiosis (Figure  
208 4C). In comparison to the UQ content found in the wt strain in aerobiosis, the level in  
209 anaerobiosis was reduced by half. Importantly, we observed that almost no UQ was  
210 detected in the  $\Delta fnr$  mutant (Figure 4C). This revealed the pivotal role that Fnr plays in  
211 allowing UQ<sub>8</sub> synthesis in the absence of O<sub>2</sub>.

212

#### 213 **4. Genetic control of *ubiUVT* gene expression**

214 Previous genome Chip-seq analysis reported binding of Fnr within the *ubiT-ubiUV* intergenic  
215 region. Additionally, in a whole genome sequence search study, one transcription start site  
216 has been described upstream of the *ubiUV* operon (*ubiUV<sub>p</sub>*) and two sites described  
217 upstream of *ubiT* (*ubiT<sub>p1</sub>*, *ubiT<sub>p2</sub>*) (19) (Figure 5A, 5B). Upon inspection of that region, we  
218 were able to identify two potential Fnr binding sites fitting well with the described Fnr  
219 binding consensus. The F1 site, reading TTGATTTAAGGCAG is located 36 nucleotides (nt)  
220 upstream the *ubiUV<sub>p</sub>* transcription start site (Figure 5A). The F2 site, reading  
221 TTGATTATACCGC locates 33 nt upstream the proximal +1 transcription starting site *ubiT<sub>p2</sub>*  
222 and 19 nt downstream the distal *ubiT<sub>p1</sub>* (Figure 5A, 5B).

223 To detail the molecular mechanism of regulation and to dissect the promoter  
224 organization of the intergenic region between *ubiUV* and *ubiT*, we used transcriptional  
225 fusions with GFP (20). We used 4 different transcriptional fusions encompassing *ubiUV<sub>p</sub>*,  
226 *ubiT<sub>p1</sub>*, *ubiT<sub>p2</sub>*, and a construction *ubiT<sub>p1p2</sub>* containing the two promoters of *ubiT* (Figure 5B).  
227 We compared the expression of these transcriptional fusions in anaerobiosis, in a  $\Delta fnr$   
228 mutant complemented or not with a pBAD-*fnr* plasmid. The *ubiUV<sub>p</sub>* and *ubiT<sub>p2</sub>* promoters  
229 were strongly activated in the presence of pBAD-*fnr*, whereas the *ubiT<sub>p1</sub>* promoter was not  
230 (Figure 5C-D). This suggested that the *ubiUV<sub>p</sub>* promoter was activated by Fnr binding to the  
231 F1 site, and that the *ubiT<sub>p2</sub>* promoter was activated by Fnr binding to the F2 site. When we  
232 introduced mutations in the F1 binding site (5 mutated nucleotides; mutF1; Figure 5A), the  
233 activation of the expression from the *ubiUV<sub>p</sub>* transcriptional fusion was severely reduced

234 (Figure 5C). Mutations of the F2 site (*mut* $\Delta$ F2 complete deletion or *mut*F2 with 5 mutated  
235 nucleotides; Figure 5A) also affected the expression of the *ubiT*<sub>p1p2</sub> transcriptional fusion, but  
236 a basal level of expression was maintained, probably due to the expression from the distal  
237 *ubiT*<sub>p1</sub> promoter (Figure 5E).

238 Next, we introduced the same mutations in the F1 and F2 Fnr binding sites at the  
239 locus in the *ubiU-ubiT* intergenic region in the chromosome of the strains producing UbiV-  
240 SPA or UbiT-SPA tagged proteins. Mutation within the F1 site upstream *ubiU* completely  
241 prevented the production of UbiV in the absence of O<sub>2</sub> (Figure 5F). Mutation within the F2  
242 site upstream the proximal *ubiT*<sub>p2</sub> promoter prevented the induction of *ubiT* in the absence  
243 of O<sub>2</sub>, without altering the basal level of UbiT-SPA observed in the presence of O<sub>2</sub> (Figure 5F  
244 and Figure S4). Notably, the mutation in the F1 binding site did not affect the expression of  
245 *ubiT* and conversely, mutation of the F2 binding site did not affect the expression of *ubiV*.

246 Altogether, these results showed that Fnr activates *ubiUV* transcription under  
247 anaerobiosis, while *ubiT* expression can be triggered from two promoters, one aerobically  
248 active (P1) and the other anaerobically active (P2) under Fnr control.

249

## 250 **5. Physiological role of UbiUVT at different O<sub>2</sub> levels**

251 We have previously reported that UbiU, UbiV, and UbiT are essential for anaerobic synthesis  
252 of UQ in *E. coli* when grown in LB, glycerol/DMSO, or lactate/NO<sub>3</sub><sup>-</sup> (3). However, the  
253 contribution to *E. coli* physiology of UQ synthesized by UbiUVT in anaerobic conditions was  
254 not investigated in detail. We made use of a set of mutants altered in aerobic (*ubiH*) or  
255 anaerobic (*ubiUV*, *ubiT*) UQ<sub>8</sub> synthesis, as well as mutants altered in DMK/MK biosynthesis  
256 (*menA*) to assess the contribution of each type of quinone for growth in a wide range of O<sub>2</sub>  
257 level, 21% (aerobic), 0.1% (microaerobic), and 0% O<sub>2</sub> (anaerobic), and with varying carbon  
258 sources (e.g. glycerol or glucose) and electron terminal acceptors (e.g. O<sub>2</sub> or NO<sub>3</sub><sup>-</sup>).

259 In the presence of glycerol and NO<sub>3</sub><sup>-</sup> under aerobic conditions (Figure 6, upper left  
260 panel)  $\Delta$ *ubiUV* and  $\Delta$ *ubiT* strains showed no growth phenotype. In such conditions, while  
261 NO<sub>3</sub> is present, O<sub>2</sub> is used for respiration. This contrasted with the  $\Delta$ *ubiH* mutant, which was  
262 severely affected. Combining  $\Delta$ *ubiH* and  $\Delta$ *ubiUV* bore no aggravating effect. In contrast,  
263 combining both  $\Delta$ *ubiH* and  $\Delta$ *menA* had an aggravating effect, indicating that in addition to  
264 UQ, DMK and/or MK can support *E. coli* growth even in aerobiosis, as previously suggested

265 (21). In microaerobic conditions (Figure 6, upper center panel), no phenotype was observed  
266 for  $\Delta ubiUV$  or  $\Delta ubiT$  strains. In contrast, the  $\Delta menA \Delta ubiH$  strain still exhibited a clear  
267 defect, suggesting that *ubiUV* and *ubiT* do not bear a prominent role in  $NO_3^-$ -dependent  
268 respiratory metabolism under microaerobic conditions, despite being expressed in  
269 microaerobiosis (see above). This notion was also supported by the fact that at 0.1%  $O_2$ , the  
270  $\Delta ubiH$  and  $\Delta ubiH \Delta ubiUV$  strains did not show any phenotype. At 0.1%  $O_2$ , UQ-dependent  
271 metabolism through cytochrome *bd* or *bo* oxidases would remain inconsequential and cells  
272 presumably rely on DMK/MK-dependent metabolism for anaerobic respiration (22). Last, in  
273 anaerobic conditions, with  $NO_3^-$  used for respiration,  $\Delta ubiUV$ ,  $\Delta ubiT$  and  $\Delta menA$  strains  
274 showed wt-like growth phenotype (Figure 6, upper right panel). However, combining  $\Delta menA$   
275 and  $\Delta ubiUV$  mutations or  $\Delta menA$  and  $\Delta ubiT$  mutations drastically hampered  $NO_3^-$   
276 respiratory capacities. In fact, growth of these mutants on M9 glycerol  $NO_3^-$  was barely  
277 better than a  $\Delta fnr$  strain (Figure 6), which was used as control since it was shown that such  
278 strain is unable to respire nitrate but can still use glucose anaerobically (23). These results  
279 indicated that anaerobically UbiUVT-synthesized UQ and MK are fully interchangeable  
280 electron carriers during  $NO_3^-$  respiration under full anaerobiosis (24). Furthermore, we could  
281 exclude that the aerobic UQ biosynthetic pathway could contribute to growth in such  
282 conditions as the  $\Delta ubiH$  and  $\Delta menA \Delta ubiH$  mutants exhibited no growth phenotype.

283 In the presence of glucose as a carbon source and under aerobiosis,  $\Delta ubiUV$  and  
284  $\Delta ubiT$  mutants exhibited wt-like growth capacity (Figure 6, left middle panel). The  $\Delta ubiH$   
285 mutant showed some slower growth but a most spectacular negative additive effect was  
286 observed upon combining  $\Delta ubiH$  and  $\Delta menA$  mutations. It likely points out a role for  
287 DMK/MK in aerobic electron transport (25). In anaerobiosis, neither  $\Delta ubiH$  nor  $\Delta menA$ , alone  
288 or in combination, showed defect in the presence of glucose as a carbon source (Figure 6,  
289 middle right panel). In contrast,  $\Delta menA \Delta ubiUV$  or  $\Delta menA \Delta ubiT$  mutants exhibited additive  
290 growth defect (Figure 6, middle right panel). This indicated that the UbiUVT-biosynthesized  
291 UQ was crucial for growth in glucose fermentative conditions, in the absence of MK. A  
292 possibility was that this negative effect reflected auxotrophy for uracil, whose synthesis  
293 depends upon electron transfer from PyrD dihydroorotate dehydrogenase to fumarate  
294 reductase (FrdABCD) via quinones in anaerobiosis (26). As a matter of fact, adding uracil to  
295 the medium had a rescuing effect (Figure 6, lower right panel), supporting the notion that

296 uracil deficiency was responsible for the growth defect observed in the  $\Delta ubiUV \Delta menA$   
297 mutant in anaerobiosis. This was an important observation as early studies had proposed  
298 that the PyrD/FrdABCD electron transfer chain relied mostly on MK/DMK and marginally, if  
299 at all, on UQ (26). Our observation clearly shows that anaerobically synthesized UQ can also  
300 allow functioning of PyrD. Incidentally, we noticed that the addition of uracil did not rescue  
301 the growth defect of the  $\Delta menA \Delta ubiH$  mutant in aerobiosis, but we have no explanation for  
302 this observation.

303

## 304 **6. Contribution of the O<sub>2</sub>-independent UQ biosynthesis pathway to mouse intestine** 305 **colonization**

306 Since enterobacteria evolve mostly in anaerobic conditions in their natural habitat, we  
307 evaluated the physiological importance of the O<sub>2</sub>-independent UQ biosynthesis pathway in  
308 the mouse intestine. To do so, we performed competition experiments between two  
309 isogenic strains, MP7 and MP13, which respectively express mCherry and GFP in the  
310 presence of tetracycline (27). We deleted *ubiUV* in the MP13 background and confirmed, as  
311 expected, that this strain was deficient for UQ<sub>8</sub> when grown anaerobically (Figure S5A). MK  
312 was previously shown to be important for efficient colonization of the mouse intestine by *E.*  
313 *coli* (28). Thus, we also constructed a  $\Delta menA$  mutant in the MP13 background. We checked  
314 that deletion of  $\Delta menA$  abrogated the synthesis of DMK and MK (Figure S5B and C). The  
315 fitness of the  $\Delta ubiUV$  and  $\Delta menA$  mutants was tested in competition experiments with the  
316 MP7 wt strain. We monitored the abundance of each strain in the feces of mice up to 10  
317 days after co-inoculation by oral gavage (Figure 7A). In both experiments, the total CFU  
318 count reached  $\sim 10^8$  per gram of feces 24 hours post inoculation (Figure 7B and C and S6A  
319 and B) and then gradually decreased to  $\sim 10^5$ , showing efficient colonization of the MP7  
320 strain. The abundance of the *ubiUV* mutant was slightly decreased compared to wt (Figure  
321 7B and S6A), which translated in an average competitive index (CI)  $< 1$  (Figure 7D and S6C) at  
322 days 1, 2, 4, and 10. We noticed however a rather high inter-individual variability (Figure  
323 S6C). In contrast, the  $\Delta menA$  mutant was markedly less abundant than the wt (Figure 7C and  
324 S6B) and was even undetectable at day 10. CI  $< 1$  were observed for every mouse at every  
325 sampling (Figure 7E and S6D) and the values obtained were much lower than in the case of  
326 the  $\Delta ubiUV$  mutant. Collectively, these data confirm that DMK/MK is the most important  
327 quinone for the physiology of *E. coli* in the mouse intestine (28). However, they also reveal a

328 contribution, albeit minor, of the O<sub>2</sub>-independent UbiUV-mediated UQ biosynthesis  
329 pathway.

330

### 331 **7. Role of UbiT within the anaerobiosis-aerobiosis shift**

332 Phenotypic analysis above revealed that anaerobically UbiUVT-synthesized UQ was  
333 contributing to growth via glucose fermentation or NO<sub>3</sub><sup>-</sup> respiration. In both conditions,  
334 anaerobic UbiUVT-synthesized UQ was functionally redundant with anaerobically  
335 synthesized DMK/MK. Because UQ is crucial under aerobiosis, we reasoned that  
336 anaerobically synthesized UQ might prepare the cells to adapt to an aerobic environment,  
337 i.e. before the aerobic UbiIHF-dependent synthesis takes over. Thus, we investigated the  
338 role of UbiUVT-synthesized UQ in the anaerobiosis-aerobiosis transition.

339         Firstly, we used  $\Delta menA\Delta ubiH$  and  $\Delta menA\Delta ubiUV$  strains that only produce UQ under  
340 anaerobiosis and aerobiosis, respectively. Strains were grown in LB supplemented with NO<sub>3</sub><sup>-</sup>  
341 under anaerobic conditions for 24 hours, then switched to aerobic conditions with succinate  
342 as carbon source, i.e. in conditions wherein growth strictly relies on UQ (24). The wt,  $\Delta menA$ ,  
343 and the  $\Delta menA\Delta ubiUV$  strains showed differential efficiency in shifting from anaerobiosis to  
344 aerobiosis, the lag periods lasting 2 to 4 hours for the wt and  $\Delta menA$  strains, and lasting 7  
345 hours for the  $\Delta menA\Delta ubiUV$  mutant (Figure 8A). This indicated that UbiUV-synthesized UQ  
346 was important for allowing a fast transition, presumably as a consequence of a higher level  
347 of UQ in wt than in  $\Delta menA\Delta ubiUV$  mutant. Eventually, both strains showed the same growth  
348 rate in exponential phase and reached the same final OD<sub>600</sub> value, suggesting that the  
349 UbiIHF-synthesized UQ was activated and fully compensated the requirement of UQ in  
350 extended aerobic conditions. To confirm this hypothesis, we re-inoculated these cells into  
351 the same medium (Figure 8A, refresh), and as expected we observed that lag periods were  
352 the same for both strains since they had accumulated the same level of UQ since the  
353 beginning of the growth. In contrast, the  $\Delta menA\Delta ubiH$  mutant – a strain defective for the  
354 aerobic UQ-synthesis pathway – exhibited drastic differences as compared with the two  
355 strains above, i.e. a slower and shorter exponential phase and a lower final OD<sub>600</sub> value.  
356 Moreover,  $\Delta menA \Delta ubiH$  mutant failed to resume growth upon reinoculation in fresh  
357 medium (Figure 8A). Altogether these results indicated that the level of anaerobically UbiUV-  
358 synthesized UQ sustained the anaerobic-to-aerobic shift but failed to sustain protracted  
359 aerobic growth. This view was further supported by measuring the UQ content during

360 transition from anaerobic to aerobic conditions in a separate experiment (Figure 8B). For  
361 this, cultures in LB of  $\Delta ubiUV$  or  $\Delta ubiT$  mutants were subjected or not to chloramphenicol  
362 (Clp) treatment prior to shift and samples were taken at 0 min, 30 min, and 120 min for UQ  
363 quantification. UQ level increased with time in both the wt and the  $\Delta ubiUV$  mutant but in  
364 the 30-120 min period it stopped increasing in the presence of translation inhibitor Clp. The  
365 likeliest explanation is that UQ biosynthesis is driven by UbiUV before the shift and later de  
366 novo synthesized by UbiH/F in aerobic conditions. This suggested that the 3 hydroxylases  
367 UbiL, H, and F were already present under anaerobiosis, in a stand-by state, waiting for O<sub>2</sub> to  
368 allow hydroxylation. Importantly, this was confirmed as levels of UbiL, H, and F proteins were  
369 found to be similar in both aerobic and anaerobic conditions (Figure S7).

370 Secondly, the role of the accessory factor, UbiT, was investigated using the  $\Delta menA$   
371  $\Delta ubiT$  mutant. As described before, the  $\Delta menA\Delta ubiT$  strain was grown first in LB with NO<sub>3</sub>  
372 under anaerobiosis, subsequently shifted in succinate minimal medium, and growth was  
373 monitored. A most unexpected and spectacular effect was observed as lag period with this  
374 strain was 3 and 5 times longer than the one observed for the  $\Delta menA \Delta ubiUV$  and wt strains,  
375 respectively (Figure 8A). However, the  $\Delta menA\Delta ubiT$  strain finally reached a final OD<sub>600</sub> value  
376 similar to WT,  $\Delta menA$ ,  $\Delta menA \Delta ubiUV$  strains at 40h, and also resumed growth upon re-  
377 inoculation at 40h (Figure 8A). This highlighted a crucial role of UbiT in the anaerobic-  
378 aerobic transition phase. This result was strengthened by direct quantification of UQ  
379 synthesized with time after shifting cultures from anaerobiosis to aerobiosis (Figure 8B). The  
380  $\Delta ubiT$  mutant exhibited a 2-fold reduction in UQ as compared with the  $\Delta ubiUV$  mutant after  
381 the shift. When Clp was added, the difference was much smaller. This confirmed that UbiT is  
382 necessary at the onset of aerobic UQ biosynthesis, presumably via the UbiH/F complex.

383

#### 384 **8. The *yhbS* gene is not involved in UQ-based metabolism**

385 The *yhbS* gene predicted to encode an acetyltransferase, lies downstream the *ubiT* gene  
386 (Figure S8A). It was recently proposed to intervene in sncRNA-mediated expression control  
387 (29). Using RT-PCR, we showed that *yhbS* and *ubiT* genes share a single transcription unit  
388 (Figure S8B). Using YhbS-SPA tag protein, we observed that YhbS protein synthesis takes  
389 place both under aerobiosis and anaerobiosis. The level of YhbS-SPA protein appears slightly  
390 higher in -O<sub>2</sub> and this induction seems to be lost in the  $\Delta fnr$  mutant, as expected if *yhbS* and  
391 *ubiT* genes are co-expressed and co-regulated by Fnr (Figure S8C). The  $\Delta yhbS$  mutant shows

392 no defect in  $\text{NO}_3^-$  respiratory capacity, and no aggravating effect was observed upon  
393 combining  $\Delta yhbS$  and  $\Delta menA$  mutations (Figure S8D). Last, we carried out shift experiments,  
394 from  $-\text{O}_2$  to  $+\text{O}_2$ , as described above for *ubiT* and failed to identify any defect in the  $\Delta yhbS$   
395 mutant (not shown). Altogether with previous assays failing to reveal a defect in UQ levels in  
396 anaerobiosis in the  $\Delta yhbS$  mutant (3), these results allowed us to rule out a role of YhbS in  
397 UQ synthesis.  
398



399 **CONCLUSION**

400

401 UQ is an essential component of electron transfer chains, and of respiratory metabolism. For  
402 decades, the dogma has been that UQ was exclusively used for aerobic respiratory  
403 metabolism, whereas DMK/MK was used for electron transfer in anaerobic respiratory  
404 chains. Following our recent discovery that UQ is also synthesized under anaerobiosis, which  
405 contradicted the above assumption (3), the present study identified two versatile anaerobic  
406 physiological processes that rely on the anaerobic UQ biosynthesis pathway, namely  $\text{NO}_3^-$   
407 respiration and uracil biosynthesis. Moreover, we provide clear evidence that UbiUV  
408 catalyze hydroxylation steps independently from  $\text{O}_2$ . Last, UbiT was found to play a key role  
409 in both anaerobiosis and aerobiosis conditions, allowing a smooth transition between the  
410 two conditions. Overall, this analysis uncovers a new facet of the strategy used by *E. coli* to  
411 adapt to changes in  $\text{O}_2$  level and respiratory conditions. This is of particular interest in the  
412 context of gut microbiota studies, as changes in  $\text{O}_2$  level and in respiratory electron  
413 acceptors are key factors that the host uses to select the type of flora present through the  
414 different sections of the intestine (30).

415 UbiUV-mediated UQ synthesis takes place under anaerobiosis. Here we showed that  
416 this is made possible by Fnr-mediated activation of expression of the *ubiUV* operon that  
417 takes place from microaerobiosis (0.1%  $\text{O}_2$ ) to anaerobiosis. In contrast, expression of the  
418 *ubiT* gene is more versatile with 2 promoters, one under Fnr control, allowing UbiT synthesis  
419 under micro- and an-aerobiosis, simultaneously with UbiUV, and the second constitutive  
420 one, insuring expression in aerobiosis. This genetic regulation is consistent with the presence  
421 of UbiT proteins under both aerobic and anaerobic conditions. Such a versatile expression  
422 meets with other evidence we collected, which together pave the way to an important role  
423 of UbiT in anaerobiosis to aerobiosis transition: (i) UbiT is required for insuring continuous  
424 UQ synthesis upon shifting from anaerobiosis to aerobiosis, (ii) *ubiT* was found to  
425 compensate for the lack of *ubiJ* in conditions where high dosage of *ubiUV* genes suppressed  
426 absence of *ubiIHF* under aerobiosis, (iii) UbiIHF enzymes are present in anaerobiosis but not  
427 active as one would expect for  $\text{O}_2$ -dependent hydroxylases. This indicates that the  $\text{O}_2$ -  
428 dependent pathway is in a stand-by mode in anaerobic conditions, waiting only for the  
429 presence of  $\text{O}_2$  to activate the  $\text{O}_2$ -dependent hydroxylases and produce UQ, as proposed



430 previously (31). This is also consistent with the fact that UbiUV synthesis is strictly controlled  
431 at the transcriptional level, whereas expression of *ubiIHF* is constitutive. Altogether, this  
432 leads us to propose that UbiT and UbiJ are required for the formation of two related but  
433 distinct metabolons, respectively an anaerobic one containing UbiUV, and an aerobic one  
434 containing UbiIHF. Besides, both UbiJ and UbiT are likely to bind UQ biosynthetic  
435 intermediates via their SCP2 domain, thereby providing the substrates to UbiUV and UbiIHF  
436 (9, 32).

437 UbiUV catalyze hydroxylation of the benzene ring in the absence of O<sub>2</sub>. Moreover,  
438 our results show that they can substitute to aerobic hydroxylases UbiIHF in the presence of  
439 O<sub>2</sub>, but that they still catalyze the hydroxylation without relying on O<sub>2</sub> in this condition. This  
440 raises the question of the source of the O atom under anaerobiosis. Previous analysis on  
441 RhlA, a member of the U32 protein family to which UbiU and V belong, indicated that  
442 prephenate, an intermediate within the aromatic amino acid biosynthesis pathway, could  
443 act as O donor (11). Our ongoing studies aim at investigating such a possibility in the case of  
444 anaerobic UQ biosynthesis. [Fe-S] clusters seem to play a role in the process, since *isc*  
445 mutants devoid of anaerobic [Fe-S] biogenesis machinery and UbiU variant lacking [Fe-S]  
446 cluster fail to produce UQ. The simplest hypothesis is that [Fe-S] clusters are transferring  
447 electrons from the O source to a terminal reductase, both to be identified.

448 UbiUVT-synthesized UQ has a significant contribution to growth in anaerobiosis and  
449 in microaerobiosis (0.1% O<sub>2</sub>). Indeed, we found that UbiUVT-synthesized UQ are key for NO<sub>3</sub><sup>-</sup>  
450 respiration in the absence of (D)MK, in agreement with early biochemical work on formate-  
451 nitrate reductase (26) and with our previous study reporting that *Pseudomonas aeruginosa*  
452 denitrifying activity depends on UbiUVT synthesized UQ (32). Moreover, we observed that  
453 the anaerobically synthesized UQ greatly contributes to uracil synthesis. This was  
454 unexpected as uracil synthesis was reported to depend mainly on the oxidation of (S)-  
455 dihydroorotate to orotate with fumarate as hydrogen acceptor and DMK/MK as an electron  
456 carrier (26). Our present physiological studies demonstrate that the anaerobically produced  
457 UQ can fully compensate the DMK/MK loss, likely through an as yet unknown reductase  
458 since UQ is too electro-positive to be a FrdABCD substrate (33). Last, UQ could be used as an  
459 electron sink to other catabolic processes taking place in both aerobiosis and anaerobiosis

460 such as heme biosynthesis, wherein HemG enzyme utilizes UQ or MK for the conversion of  
461 protoporphyrinogen IX into protoporphyrin IX (34).

462 The contribution of anaerobically synthesized UQ for *E. coli* multiplication in the gut  
463 appeared as marginal. This implies that either absence of UV-synthesized UQ was masked by  
464 MK/DMK synthesis, or anaerobic UQ-dependent processes such as  $\text{NO}_3^-$  respiration or uracil  
465 biosynthesis is dispensable. Clearly the first possibility is the likeliest given the paramount  
466 importance of anaerobic respiration for *E. coli* multiplication in the gut (35, 36), as nicely  
467 confirmed by the drastically altered multiplication of MK/DMK deficient cells (Figure 7). This  
468 is of particular interest as presence and nature of respiratory electron acceptors were  
469 proposed to be drivers of bacterial community composition in the different regions of the  
470 intestine (30). Likewise, the relatively high  $\text{O}_2$  level in duodenum, of  $\text{NO}_3^-$  in ileum, and  
471 hypoxia in cecum were proposed to be causal of the different flora hosted in these regions in  
472 healthy host. Strategies used by *E. coli* to live in such different respiratory and fermentative  
473 conditions are therefore key aspects of its adaptation to the host. In this context, it is  
474 important to understand the mechanism underlying the switch from  $\text{O}_2$ -rich to  $\text{NO}_3^-$ -rich  
475 and/or hypoxic compartments and the present study highlights the added value of having  
476 overlapping systems permitting smooth shift from anaerobic  $\text{NO}_3^-$  to aerobic respiration.

477

478 **MATERIAL AND METHODS**

479

480 **Strain constructions (Table 1)**

481 Most knockout strains were obtained by generalized  $\Phi$  P1 transduction using donor strains  
482 from the Keio collection (37). For introducing the SPA-tag on the chromosome or for  
483 generation of specific knockouts, PCR recombination with the lambdaRed system was used,  
484 using the oligonucleotides indicated in Table 1 (18, 38). When necessary, the antibiotic  
485 resistance marker was removed using FLP recombinase expression from plasmid pCP20 as  
486 described previously (39). Cassette removal and plasmid loss were verified by antibiotic  
487 sensitivity and confirmed by PCR amplification. Point mutations were introduced on the  
488 chromosome using the pKO3 vector (40).

489 For mouse intestine colonization experiments, we used MP7 and MP13 strains, which  
490 derive from the commensal *E. coli* MP1 strain (27). MP7 and MP13 express respectively  
491 mCherry or GFP under the control of a tetracycline inducible promoter.  $\Delta menA$  and  $\Delta ubiUV$   
492 deletions were introduced in MP13 using generalized  $\Phi$  P1 transduction.

493

494 **Plasmid constructions (Table 2)**

495 pUA66 and pUA-*ubiUV*p plasmids were obtained from the library of *E. coli* promoters fused  
496 to GFP coding sequence (20). The *ubiT* transcriptional fusions were constructed using  
497 primers indicated in Table 3 and cloned in XhoI/BamHI sites of pUA66. Expression plasmids  
498 for *ubiUV* and *fnr* were constructed using primers indicated in Table 3 and cloned in  
499 EcoRI/SalI sites of pBAD24 vector (41). Expression plasmids for *ubiIHF* and *ubiM\_Neisseria*  
500 genes were constructed using primers indicated in Table 3 and cloned in EcoRI/XhoI sites of  
501 pTet vector. A region of 1275 base pairs encompassing *ubiU* and *ubiT* promoters was cloned  
502 in pKO3 vector (40). Mutations were introduced in the pKO3-*ubiTU* vector, in the pBAD-  
503 *ubiUV*, and in the transcriptional fusions by PCR mutagenesis on plasmid, using the  
504 oligonucleotides indicated (Tables 2 and 3).

505

## 506 **Media and growth conditions**

507 Strains were grown in LB miller (10g/l of tryptone, 10g/l of NaCl and 5g/l of yeast extract) or  
508 M9 medium (6 g/l Na<sub>2</sub>HPO<sub>4</sub>•7H<sub>2</sub>O, 3 g/l KH<sub>2</sub>PO<sub>4</sub>, 0.5 g/l NaCl, 1 g NH<sub>4</sub>Cl, 2 mM MgSO<sub>4</sub>,  
509 1mg/ml thiamine) supplemented with 0.2% glucose, 0.2% glycerol, or 50mM succinate as  
510 the carbon source. For anaerobic cultures, media were degazed and incubated in anaerobic  
511 environment for at least 24 hours prior to use, if necessary supplemented with 25mM KNO<sub>3</sub>  
512 as electron acceptor and uracil 25ug/ml or casamino acids at 0.05%.

513 For microaerobic experiments, media and plates were pre-equilibrated and cells were  
514 cultured in a Whitley® H35 hypoxic station with 95% N<sub>2</sub>, 5% CO<sub>2</sub> and the desired O<sub>2</sub>  
515 concentration. Humidity and temperature were set up at 85% and 37°C, respectively. For  
516 anaerobic-aerobic shift experiments, all anaerobic steps were performed in a JACOMEX®  
517 Campus anaerobic chamber under N<sub>2</sub> atmosphere at 1ppm O<sub>2</sub> maximum. Cells were first  
518 isolated anaerobically in LB agar plates supplemented with 0.2% Glucose and incubated  
519 overnight at 37°C. Next day, cells were cultured anaerobically in 3mL LB supplemented with  
520 25mM NO<sub>3</sub><sup>-</sup> for 24 hours at 37°C. Still under anaerobiosis, cells were collected by  
521 centrifugation, supernatant was discarded, and pellets were washed twice using 1mL M9  
522 medium without carbon source and normalized at 0.1 OD units in M9 medium  
523 supplemented with 50mM Sodium Succinate. At this point, cultures were moved out to  
524 atmospheric air and growth was followed by triplicate at 37°C on 200µl of culture in a 96-  
525 well plate using a TECAN infinite M200 plate reader. At 40h of culture, cells were diluted  
526 1/20 in new M9 50mM Sodium Succinate medium and readings were resumed until 60  
527 hours.

528 **Aerobic and anaerobic cultures for quinone analysis:**

529 For aerobic cultures, 5 mL of LB medium, supplemented with Ampicillin (100 µg/mL) and  
530 0.05% arabinose when necessary to induce the expression from the pBAD vectors, was  
531 inoculated with 100 µl of an overnight culture in glass tubes (15 cm long and 2 cm in  
532 diameter) and incubated at 37°C, 180 rpm overnight.

533 Anaerobic cultures were performed in Hungate tubes as previously described (3). Briefly, LB  
534 medium was supplemented with 100 mM KNO<sub>3</sub> as final electron acceptor, 100 mg/liter L-  
535 cysteine (adjusted to pH 6 with NaOH) in order to reduce residual molecular oxygen and 2.5  
536 mg/liter reasazurin. This medium was distributed in Hungate tubes and deoxygenated by

537 high purity argon bubbling for 40 min. The Hungate tubes were sealed and autoclaved. The  
538 resazurin was initially purple, it turned to pink after deoxygenation and become colorless  
539 after autoclave. The preculture was performed overnight at 37°C in Eppendorf tubes filled to  
540 the top with LB medium containing 100 mM KNO<sub>3</sub>. The Hungate tubes were then inoculated  
541 through the septum by disposable syringes and needles with 100 µL of precultures and  
542 incubated at 37°C without agitation. The resazurin remained colorless during culture  
543 indicating anaerobic conditions.

544 For anaerobic to aerobic shift assay, MG1655 WT, *ΔubiUV*, and *ΔubiT* strains were grown  
545 anaerobically in Hungate tubes for ~ 4 hours. Then, 26 µL of chloramphenicol (200 µg/mL)  
546 was injected through the septum by Hamilton syringe. After 20 minutes, the Hungate tubes  
547 were unsealed, 2 mL of cultures was taken for lipid extraction and quinone analysis. The rest  
548 of cultures was transferred to 250 mL Erlenmeyer flasks and placed at 37°C, 180 rpm for 2  
549 hours. 2 mL aliquots of cultures were taken at 30 min and 120 min after transition to  
550 ambient air for lipid extraction and quinone analysis.

551

#### 552 **SDS-PAGE and Western blotting**

553 Total cell extracts were prepared by resuspending cell pellets in Laemli buffer 1X at a  
554 concentration of 0.3 OD<sub>600nm</sub> units in 10 µl, and then heating for 10 minutes at 95°C. After  
555 separation of 8 µl of total cell extracts on SDS-PAGE, electrotransfer onto nitrocellulose  
556 membranes was performed using Trans-Blot turbo transfer system from Biorad. After  
557 blocking in PBS 1X + milk 5%, SPA-tagged proteins were detected with monoclonal anti-Flag  
558 M2 antibody purchased from Sigma. YbgF protein was used as an internal control and  
559 revealed with polyclonal anti-YbgF antibodies. Fluorescent secondary antibodies were  
560 respectively IRDye 800 anti-mouse and IRDye 680 anti-rabbit purchased from Li-Cor.  
561 Scanning and quantification were performed on a Li-Cor Odyssey-Fc imaging system, reading  
562 at 700 nm (for YbgF detection) or 800 nm (for Flag detection).

563

#### 564 **Transcriptional fusions with GFP**

565 We used several clones from the *E. coli* transcriptional fusions library (20) and we  
566 constructed the required additional transcriptional fusions (see above for plasmid  
567 construction and Table 2). *Δfnr E. coli* strain was co-transformed with plasmids carrying the

568 *gfp* transcriptional fusions and compatible pBAD24 or pBAD-*fnr* plasmids. Selection plates  
569 were incubated at 37°C for 16h. 600 µl of LB medium supplemented with kanamycin and  
570 ampicillin, and with 0.02% arabinose for pBAD-driven expression, were incubated (4  
571 biological replicates for each assay) and grown for 16 hours at 37°C in 96-well polypropylene  
572 plates of 2.2 ml wells in anaerobiosis. Cells were pelleted and resuspended in PBS  
573 supplemented with 30 µg/ml chloramphenicol and incubated at 4°C for 1 hour before  
574 fluorescent intensity measurement was performed in a TECAN infinite M200 plate reader.  
575 150 µl of each well was transferred into black Greiner 96-well plate for reading optical  
576 density at 600nm and fluorescence (excitation: 485nm; emission: 530 nm). The expression  
577 levels were calculated by dividing the intensity of fluorescence by the optical density at 600  
578 nm, after subtracting the values of a blank sample. These results are given in arbitrary units  
579 because the intensity of fluorescence is acquired with an automatic optimal gain and hence  
580 varies from one experiment to the other.

581

#### 582 **Lipid extraction and quinone analysis**

583 Cultures of 2, 5, or 10 mL were cooled on ice for at least 30 min before centrifugation  
584 at 3200 x g at 4°C for 10 min. Cell pellets were washed in 1 mL ice-cold phosphate-buffer  
585 saline (PBS) and transferred to preweighted 1.5 mL Eppendorf tubes. After centrifugation at  
586 12,000 g at 4 °C for 1 min, the supernatant was discarded, the cell wet weight was  
587 determined and pellets were stored at -20°C until lipid extraction, if necessary. Quinone  
588 extraction from cell pellets was performed as previously described (6). The dried lipid  
589 extracts were resuspended in 100 µL ethanol, and a volume corresponding to 1 mg of cell  
590 wet weight was analyzed by HPLC electrochemical detection-MS (ECD-MS) with a BetaBasic-  
591 18 column at a flow rate of 1 mL/min with a mobile phase composed of 50% methanol, 40%  
592 ethanol, and 10% of a mix (90% isopropanol, 10% ammonium acetate (1 M), and 0.1% formic  
593 acid). When necessary, MS detection was performed on an MSQ spectrometer (Thermo  
594 Scientific) with electrospray ionization in positive mode (probe temperature, 400°C; cone  
595 voltage, 80 V). Single-ion monitoring detected the following compounds: UQ<sub>8</sub> (M+H<sup>+</sup>), m/z  
596 727-728, 6–10 min, scan time of 0.2 s; 3(<sup>18</sup>O)-UQ<sub>8</sub> (M+H<sup>+</sup>), m/z 733-734, 6–10 min, scan time  
597 of 0.2 s; UQ<sub>8</sub> (M+NH<sub>4</sub><sup>+</sup>), m/z 744-745, 6–10 min, scan time of 0.2 s; UQ<sub>10</sub> (M+NH<sub>4</sub><sup>+</sup>), m/z 880–  
598 881, 10-17 min. MS spectra were recorded between m/z 600 and 900 with a scan time of 0.3  
599 s. ECD and MS peak areas were corrected for sample loss during extraction on the basis of

600 the recovery of the UQ<sub>10</sub> internal standard and then were normalized to cell wet weight. The  
601 peaks of UQ<sub>8</sub> obtained with electrochemical detection or MS detection were quantified with  
602 a standard curve of UQ<sub>10</sub> as previously described (6).

603

#### 604 <sup>18</sup>O<sub>2</sub> labeling

605 MG1655 wt and *ΔubiHΔubiF* containing respectively the pBAD24 empty vector or  
606 pBAD-*ubiUV* were grown overnight at 37°C in LB medium supplemented with Ampicillin (100  
607 µg/mL) and 0.05% arabinose. These precultures were used to inoculate 20 mL of the same  
608 fresh medium at an optical density at 600 nm (OD<sub>600</sub>) of 0.05 in Erlenmeyer flasks of 250 mL.  
609 The cultures were grown at 37°C, 180 rpm, until an OD<sub>600</sub> of 0.4-0.5 was reached. An aliquot  
610 was taken for lipid extraction and quinone analysis (0 min of <sup>18</sup>O<sub>2</sub>) and 13 mL of each culture  
611 was transferred to an Hungate tube. 5 mL of labeled molecular oxygen (<sup>18</sup>O<sub>2</sub>) was injected  
612 through the septum with disposable syringes and needles, and the incubation was continued  
613 at 37°C, 180 rpm for 2 hours. Then 5 mL of each sample was taken for quinone analysis (120  
614 min of <sup>18</sup>O<sub>2</sub>).

615

#### 616 **Mouse intestine colonization experiments**

617 All animal experiments were performed in accordance with the institutional and national  
618 guidelines. Experiments were performed under the supervision of C.L. (agreement 38 10 38)  
619 in the Plateforme de Haute Technologie Animale (PHTA) animal care facility (agreement  
620 C3851610006 delivered by the Direction Départementale de la Protection des Populations)  
621 and were approved by the ethics committee of the PHTA and by the French government  
622 (APAFIS#14895- 2018042623275606.v5).

623 4-week-old female BALB/cByJ were purchased from Charles River Laboratories (Saint-  
624 Germain-Nuelles) and were acclimatized in a controlled animal facility under specific  
625 pathogen-free conditions for two weeks prior to the beginning of the colonization assay.  
626 Mice were randomly assigned to groups of three or five per cage and ear punching was used  
627 in order to identify each mouse in a given cage.

628 The colonization experiments were adapted and performed as previously described  
629 (42, 43). Mice were given drinking water containing streptomycin sulfate and glucose (both 5  
630 g/L) for 72 hours to remove existing resident anaerobic facultative microflora. For clearance

631 of streptomycin, fresh water devoid of antibiotic and glucose was then given to mice for 48  
632 hours before inoculation of *E. coli* strains and for the rest of experiment. To start the  
633 competition experiment, the mice were orally inoculated with 200  $\mu$ L of a mixture in a 1:1  
634 ratio of the two competing strains at  $\sim$  20,000 cells/mL in PBS. Mice from each cage were  
635 orally inoculated with the same solution of bacteria. An aliquot of inoculum was plated on LB  
636 agar containing 15  $\mu$ g/mL tetracycline in order to compute the input value.

637         The relative abundance of both competing strains was then monitored at several  
638 days post-inoculation in fecal samples. Fecal samples were collected from each mouse in  
639 preweighed 1.5 mL Eppendorf tubes containing the equivalent of 100  $\mu$ L glass beads  
640 (diameter 0.25 to 0.5 mm) and 80  $\mu$ L PBS and the feces weight was determined. A volume of  
641 PBS was then added to each tube in order to obtain a final concentration of 0.15 g of feces  
642 per 1 mL PBS. The feces were homogenized by vortexing for 2 min, serially diluted by 10-fold  
643 steps up to a  $10^5$ -fold dilution, and aliquots of 70  $\mu$ L were plated on LB agar medium  
644 containing 15  $\mu$ g/mL tetracycline. The plates were incubated overnight at 37°C and were  
645 transferred at 4°C for at least 2 hours the following day, before imaging under blue light  
646 which revealed the fluorescent markers carried by each colony. The red and green colonies  
647 corresponding respectively to MP7 and MP13 strains were counted by an adapted version of  
648 ImageJ. Then, the CFU was computed per gram of feces for each strain and a competitive  
649 index (CI) was calculated as a ratio of (MP13 mutant CFU/MP7 wt CFU) / (input MP13  
650 mutant CFU/input MP7 wt CFU), where the input CFU was determined from the inoculum  
651 for which an aliquot was plated on the day of gavage. The limit of detection in fecal plate  
652 counts was  $10^2$  CFU/g feces. At all-time points, the wt strain was detectable on the fecal  
653 plates. The absence of CFU count and CI for one day in one mouse corresponds to the  
654 absence of feces for that day. Significance of CI was calculated by GraphPad Prism using one-  
655 sample t test compared to one.



656 **Acknowledgements**

657 We thank Marc Fontecave and Murielle Lombard from College de France, and the members  
658 of the SAME unit at Pasteur for discussion and help. We thank Mark Goulian (University of  
659 Pennsylvania, USA) for providing the MP7 and MP13 *E. coli* strains and Laurent Loiseau for  
660 providing the UbiUVT SPA-tagged strains. We gratefully acknowledge the help of TrEE team  
661 members with the mouse intestine colonization experiments, Françoise Blanquet, Dalil  
662 Hannani, Clément Caffaratti, and Amélie Amblard. We are also grateful to Arnold Fertin for  
663 developing the ImageJ plugin used for the automatic counting of red and green colonies.  
664 This project was supported by Institut Pasteur and CNRS and by grants from the ANR (ANR-  
665 10-LABX-62-IBEID and ANR-19-CE44-0014O2-TABOO).  
666

667 **Table 1: Strains used in this study**

668

| Strain  | Genotype                      | Construction                                                                                       | Reference  |
|---------|-------------------------------|----------------------------------------------------------------------------------------------------|------------|
| FBE051  | MG1655                        |                                                                                                    | Lab strain |
| FBE229  | <i>ΔubiUV::kan</i>            | PCR LL792/LL715 on pKD4, recombined in BW25113, followed by $\Phi$ P1 transduction in MG1655       | This work  |
| FBE230  | <i>ΔubiUV::cat</i>            | PCR LL792/LL715 on pKD3, recombined in BW25113, followed by $\Phi$ P1 transduction in MG1655       | This work  |
| FBE254  | <i>ΔubiT::kan</i>             |                                                                                                    | (3)        |
| FBE255  | <i>ΔubiT::cat</i>             |                                                                                                    | (3)        |
| FBE354  | <i>Δfnr::aadA</i>             |                                                                                                    | (44)       |
| FBE430  | <i>ΔmenA::kan</i>             | $\Phi$ P1 transduction from Keio <i>ΔmenA</i> to MG1655                                            | This work  |
| FBE501  | <i>ΔmenA</i>                  | kanamycin cassette removed from FBE430 with pCP20                                                  | This work  |
| FBE526  | <i>ΔmenA ΔubiT::kan</i>       | $\Phi$ P1 transduction from FBE254 to FBE501                                                       | This work  |
| FBE527  | <i>ΔmenA ΔubiUV::kan</i>      | $\Phi$ P1 transduction from FBE229 to FBE501                                                       | This work  |
| FBE947  | <i>ΔubiH::Kan ΔubiUV::cat</i> | $\Phi$ P1 transduction from FBE230 to FBE253                                                       | This work  |
| FBE1013 | <i>ΔmenA ΔubiH::kan</i>       | $\Phi$ P1 transduction from FBE253 to FBE501                                                       | This work  |
| FBE1032 | <i>ΔpyrD::kan</i>             | $\Phi$ P1 transduction from Keio <i>ΔpyrD</i> to MG1655                                            | This work  |
| FBE253  | <i>ΔubiH::kan</i>             |                                                                                                    | (13)       |
| FBE510  | <i>ΔubiD::cat</i>             |                                                                                                    | (3)        |
| FBE512  | <i>ΔubiF::kan</i>             |                                                                                                    | (6)        |
| FBE515  | <i>ΔubiK::kan</i>             |                                                                                                    | (45)       |
| FBE518  | <i>ΔubiA::cat</i>             |                                                                                                    | (3)        |
| FBE690  | <i>Δubil</i>                  | $\Phi$ P1 transduction from Keio <i>Δubil</i> to MG1655 then kanamycin cassette removed with pCP20 | This work  |
| FBE713  | <i>ΔubilK</i>                 | $\Phi$ P1 transduction from FBE515 to FBE690                                                       | This work  |
| FBE576  | <i>ΔubilFΔubiHF::cat</i>      |                                                                                                    | (13)       |
| FBE650  | <i>ΔubilHF</i>                | FBE576 strain cured with pCP20 plasmid                                                             | This work  |
| FBE514  | <i>ΔubiJ::cat</i>             |                                                                                                    | (46)       |
| FBE794  | <i>ΔubiJΔubiH</i>             | $\Phi$ P1 transduction from FBE514 to FBE253                                                       | This work  |
| FBE264  | <i>ΔubiJΔubiF</i>             | $\Phi$ P1 transduction from FBE514 to FBE512                                                       | This work  |
| FBE795  | <i>ΔubiTΔubiH</i>             | $\Phi$ P1 transduction from FBE255 to FBE253                                                       | This work  |
| FBE265  | <i>ΔubiTΔubiF</i>             | $\Phi$ P1 transduction from FBE255 to FBE512                                                       | This work  |
| FBE792  | <i>ΔubiHΔubiA</i>             | $\Phi$ P1 transduction from FBE518 to FBE253                                                       | This work  |
| FBE793  | <i>ΔubiHΔubiD</i>             | $\Phi$ P1 transduction from FBE510 to FBE253                                                       | This work  |
| FBE656  | <i>ubiU-SPA-kan</i>           | $\Phi$ P1 transduction DY330ubiU-SPA in MG1655                                                     | This work  |
| FBE789  | <i>ubiV-SPA-kan</i>           | $\Phi$ P1 transduction DY330ubiV-SPA in MG1655                                                     | This work  |

|        |                                             |                                                                                                |           |
|--------|---------------------------------------------|------------------------------------------------------------------------------------------------|-----------|
| FBE655 | <i>ubiT-SPA-kan</i>                         | Recombination PCR LL711/LL712 on pJL148 in BW25113 then $\Phi$ P1 transduction in MG1655       | This work |
| FBE695 | $\Delta$ <i>fnr ubiU-SPA-kan</i>            | $\Phi$ P1 transduction from FBE656 to FBE354                                                   | This work |
| FBE696 | $\Delta$ <i>fnr ubiV-SPA-kan</i>            | $\Phi$ P1 transduction from FBE789 to FBE354                                                   | This work |
| FBE694 | $\Delta$ <i>fnr ubiT-SPA-kan</i>            | $\Phi$ P1 transduction from FBE655 to FBE354                                                   | This work |
| FBE882 | <i>ubiT-SPA mutF1</i>                       | Recombination pKO3- <i>ubiTUmutF1</i> (pVP222) in FBE655                                       | This work |
| FBE883 | <i>ubiT-SPA mut<math>\Delta</math>F2</i>    | Recombination pKO3- <i>ubiTUmut<math>\Delta</math>F2</i> (pVP223) in FBE655                    | This work |
| FBE884 | <i>ubiV-SPA mutF1</i>                       | Recombination pKO3- <i>ubiTUmutF1</i> (pVP222) in FBE789                                       | This work |
| FBE885 | <i>ubiV-SPA mut<math>\Delta</math>F2</i>    | Recombination pKO3- <i>ubiTUmut<math>\Delta</math>F2</i> (pVP223) in FBE789                    | This work |
| FBE855 | <i>yhbS-SPA-kan</i>                         | Recombination PCR <i>ebp292/293</i> on pJL148 in BW25113 then $\Phi$ P1 transduction in MG1655 | This work |
| FBE856 | $\Delta$ <i>fnr yhbS-SPA-kan</i>            | $\Phi$ P1 transduction from FBE856 to FBE354                                                   | This work |
| FBE857 | $\Delta$ <i>yhbS</i>                        | $\Phi$ P1 transduction from Keio $\Delta$ <i>yhbS</i> to MG1655                                | This work |
| FBE858 | $\Delta$ <i>yhbS<math>\Delta</math>menA</i> | $\Phi$ P1 transduction from Keio $\Delta$ <i>yhbS</i> to FBE354                                | This work |
| FBE484 | MP7                                         | Lambda att : tetR tetA-mCherry                                                                 | (27)      |
| FBE485 | MP13                                        | Lambda att : tetR tetA-gfpmut3.1                                                               | (27)      |
| FBE550 | <i>MP13<math>\Delta</math>ubiUV</i>         | $\Phi$ P1 transduction from FBE229 to FBE485                                                   | This work |
| FBE888 | <i>MP13<math>\Delta</math>menA</i>          | $\Phi$ P1 transduction from FBE430 to FBE485                                                   | This work |

669

670

671 **Table 2: Plasmids used in this study.**

672

| Plasmid | Name                               | Description / Construction                                                      | Source    |
|---------|------------------------------------|---------------------------------------------------------------------------------|-----------|
| pCP20   | pCP20                              | Ap, Cm, FLP recombinase expression                                              | (39)      |
| pEB227  | pBAD24                             | AmpR – ColE1 ori – PBAD promoter                                                | (41)      |
| pEB267  | pKD46                              | AmpR – ts ori – lambda Red genes                                                | (38)      |
| pEB268  | pKD3                               | AmpR – FRT-cat-FRT                                                              | (38)      |
| pEB269  | pKD4                               | AmpR – FRT-kanaR-FRT                                                            | (38)      |
| pEB794  | pJL148                             | AmpR – SPA-FRT-kanaR-FRT                                                        | (18)      |
| pES154  | pBAD- <i>ubiUV</i>                 | PCR on MG1655 genomic DNA <i>ebp134/136</i> (EcoRI/XhoI) in pBAD24 (EcoRI/SalI) | This work |
| pES185  | pBAD- <i>ubiU</i> (C176A) <i>V</i> | Mutagenesis PCR <i>ebp178/179</i> on pES154                                     | This work |
| pES184  | pBAD- <i>ubiUV</i> -SPA            | PCR <i>ebp134/ebm968</i> on strain FBE696(EcoRI/XhoI) in pBAD24 (EcoRI/SalI)    | This work |
| pVP040  | pBAD- <i>fnr</i>                   | PCR on MG1655 genomic DNA <i>ebp31/32</i> (MfeI/XhoI) in pBAD24 (EcoRI/SalI)    | This work |
| pEB1242 | pASK-IBA37plus                     | AmpR – ColE1 ori – TetR promoter – 6His                                         | IBA       |
| pEB1823 | pTet                               | PCR mutagenesis <i>ebm1567/1568</i> on pEB1242 to remove 6His tag               | This work |
| pES060  | pTet- <i>ubil</i>                  | PCR on MG1655 genomic DNA <i>ebp64/65</i> (EcoRI/XhoI) in pTet (EcoRI/XhoI)     | This work |
| pES059  | pTet- <i>ubiH</i>                  | PCR on MG1655 genomic DNA <i>ebp61/62</i> (EcoRI/XhoI) in pTet (EcoRI/XhoI)     | This work |
| pES143  | pTet- <i>ubiF</i>                  | PCR on MG1655 genomic DNA <i>ebp37/38</i> (EcoRI/XhoI) in pTet (EcoRI/XhoI)     | This work |
| pES151  | pTet- <i>ubiM</i> _Neisseria       | PCR on MG1655 genomic DNA <i>ebp139/140</i> (EcoRI/XhoI) in pTet (EcoRI/XhoI)   | This work |
| pEB898  | pUA66                              | KanR - pSC101 ori - GFPmut2                                                     | (20)      |
|         | pUA- <i>ubiUVp</i>                 |                                                                                 | (20)      |
| pVP220  | pUA- <i>ubiUVp</i> mutF1           | Mutagenesis PCR <i>Ebp287/288</i> on pUA- <i>ubiU</i>                           | This work |
|         | pUA- <i>ubiTp1p2</i>               |                                                                                 | (20)      |
| pVP169  | pUA- <i>ubiTp1</i>                 | PCR on MG1655 genomic DNA <i>ebp191/192</i> (XhoI/BamHI) in pUA66 (XhoI/BamHI)  | This work |
| pVP170  | pUA- <i>ubiTp2</i>                 | PCR on MG1655 genomic DNA <i>ebp193/194</i> (XhoI/BamHI) in pUA66 (XhoI/BamHI)  | This work |
| pVP187  | pUA- <i>ubiTp1p2</i> ΔF2           | Mutagenesis PCR <i>Ebp237/238</i> on pUA- <i>ubiT</i>                           | This work |
| pVP221  | pUA- <i>ubiTp1p2</i> mutF2         | Mutagenesis PCR <i>Ebp289/290</i> on pUA- <i>ubiT</i>                           | This work |
| pEB232  | pKO3                               | camR, pSC101 ori, <i>sacB</i>                                                   | (40)      |
| pVP219  | pKO3- <i>ubiTU</i>                 | PCR on MG1655 genomic DNA <i>ebp276/291</i> (XhoI/BamHI) in pKO3 (SalI/BamHI)   | This work |
| pVP222  | pKO3- <i>ubiTU</i> mutF1           | Mutagenesis PCR <i>ebp287/288</i> on pVP219                                     | This work |
| pVP223  | pKO3- <i>ubiTU</i> mutΔF2          | Mutagenesis PCR <i>ebp237/238</i> on pVP219                                     | This work |

673

674

675 **Table 3 : Primers used in this study.**

| Primers | sequence                                                              | use                    |
|---------|-----------------------------------------------------------------------|------------------------|
| ebm968  | ttgctcgagAAGCAGCTCCAGCCTACACG                                         | <i>ubiV</i> -SPA RV    |
| ebm1567 | GAAATAATTTTGTTAACCTTAAAGAAGGAGATGAATTCGAGCTCGGTACCCG                  | pEB1823                |
| ebm1568 | CGGGTACCGAGCTCGAATTCATCTCCTTCTTAAAGTTAAACAAAATTATTC                   | pEB1823                |
| Ebp31   | GAGCAATTGatgATCCCGAAAAGCGAATTATAC                                     | <i>fnr</i> FW MfeI     |
| Ebp32   | acgctcgagtcaGGCAACGTTACGCGTATG                                        | <i>fnr</i> RV XhoI     |
| Ebp37   | actgaattcatgACAAATCAACCAACGGAAATTG                                    | <i>ubiF</i> FW EcoRI   |
| Ebp38   | acgctcgagctaCAACCCTAACGCATATTTTCAGC                                   | <i>ubiF</i> RV XhoI    |
| Ebp61   | actgaattcATGAGCGTAATCATCGTCGGTG                                       | <i>ubiH</i> FW EcoRI   |
| Ebp62   | acgctcgagTtAACGCGCCACCCAACC                                           | <i>ubiH</i> RV XhoI    |
| Ebp64   | actgaattcATGCAAAGTGTGATGTAGCCATTG                                     | <i>ubil</i> FW EcoRI   |
| Ebp65   | acgctcgagTTAACGCAGCCATTCAGGCAAATC                                     | <i>ubil</i> RV XhoI    |
| Ebp134  | actgaattcatgGAGCTGCTCTGCCCTG                                          | <i>ubiU</i> FW EcoRI   |
| Ebp136  | actgaattcATGAAATATTCCTTAGGGCCAGTG                                     | <i>ubiV</i> RV XhoI    |
| Ebp139  | actgaattcATGGGTTTTGATATAATCGCCTATC                                    | <i>ubiM</i> FW EcoRI   |
| Ebp140  | acgctcgagTCAACCGGTCAGTTGTTGGTAATC                                     | <i>ubiM</i> RV XhoI    |
| Ebp178  | TTATGTCCGAAGGTCGTgCTATCTGTCTCGTATC                                    | <i>ubiU</i> (C179A) FW |
| Ebp179  | GATACGACGACAGATAGgcACGACCTCCGACATAA                                   | <i>ubiU</i> (C179A) RV |
| Ebp191  | acgctcgagTTAAGCGCCGGGAGATTTCC                                         | <i>ubiTp1</i> FW       |
| Ebp192  | cgggatccTGCTGCTACCACCAATACAAC                                         | <i>ubiTp1</i> RV       |
| Ebp193  | cgggatccTTTTAGCGCAAATGGCGTCAG                                         | <i>ubiTp2</i> RV       |
| Ebp194  | acgctcgagAGCAGCAATTTTCATATGGAATTGTTG                                  | <i>ubiTp2</i> FW       |
| Ebp237  | ttggtgtagcagcaatttcatatggaattgctatgttatttttctgat                      | mutΔ <i>Fnr</i> 2 FW   |
| Ebp238  | atcagaaaaataacatagcaatttcatatgaaattgctgctaccaccaa                     | mutΔ <i>Fnr</i> 2 RV   |
| Ebp275  | actgaattcaTGTTGGATAAACTGCGTCCCC                                       | <i>ubiT</i> FW         |
| Ebp276  | acgctcgagTTAGCATGGTTCACCTACCGATG                                      | <i>ubiT</i> RV XhoI    |
| Ebp285  | acgctcgagTTAAAAGCGATTGAAATGCTCG                                       | <i>yhbS</i> RV         |
| Ebp287  | CAACTTAACTGCCTTAAtcatcAAATTGTCGCAGCAAG                                | mut <i>Fnr</i> 1 FW    |
| Ebp288  | CTTGCTGCGACAATTTgatgaTTAAGGCAGTTAAAGTTG                               | mut <i>Fnr</i> 1 RV    |
| Ebp289  | CAGCAATTTTCATATGGAATTGcatgaTTATACCGCTATGTTATTTTTC                     | mut <i>Fnr</i> 2 FW    |
| Ebp290  | GAAAAATAACATAGCGGTATAAtcatgCAATTCATATGAAATTGCTG                       | mut <i>Fnr</i> 2 RV    |
| Ebp291  | cgggatccTACGACGACAGATAGCAACGAC                                        | <i>ubiU</i> RV BamHI   |
| Ebp292  | GGCGTTACCGGCCTGGTTGAGTATCACGAGCATTTCATCGCTTTTCCATGGA<br>AAAGAGAAG     | <i>yhbS</i> -tag FW    |
| Ebp293  | GCGCAGGGTTTGCAGAGCTGTTAAGCAGTCTGCAAACCCCGGAGACATATG<br>AATATCCTCCTTAG | <i>yhbS</i> -tagRV     |
| LL710   | AAAACCGCGCTGAAACCAACAGACATCGGTAGGTGAACCATGCTCCATGG                    | <i>ubiT</i> -tag FW    |
| LL711   | GCAGGGCATCAATACCCGGCGCATCAATGGGAATTTCTACTCGAACATATGA<br>ATATCCTCCTTAG | <i>ubiT</i> -tagRV     |
| LL715   | aaagagtagttaaagttgtaacaaagtgagctatttacCATATGAATATCCTCCTTA             | RV <i>ubiV</i> Wanner  |
| LL792   | catttttgcgttttgatagcgcaaccttcaggaataattGTGTAGGCTGGAGCTGCTTC           | FW <i>ubiU</i> Wanner  |

676

677 **LEGENDS**

678

679 **Figure 1. Complementation of *ubiI*, *ubiH*, and *ubiF* mutants by pBAD-*ubiUV* in the presence**  
680 **of O<sub>2</sub>. (A).** *E. coli* mutant strains  $\Delta ubiH$  (FBE253),  $\Delta ubiF$  (FBE512),  $\Delta ubiIK$  (FBE713), and  
681  $\Delta ubiIH\Delta ubiF$  (FBE650) were transformed by pBAD24 (e.v.), pBAD-UbiUV, and pBAD-  
682 UbiU(C176A)V plasmids. **(B).** *E. coli* mutant strains  $\Delta ubiH\Delta ubiA$  (FBE792),  $\Delta ubiH\Delta ubiD$   
683 (FBE793), and  $\Delta ubiH$  (FBE253) were transformed by pBAD24 (e.v.) and pBAD-UbiUV. (A-B)  
684 After selection in the absence of O<sub>2</sub>, cultures were washed and serially diluted in minimal  
685 medium then spotted on M9 succinate plates containing 0.02% arabinose, and incubated at  
686 37°C for 48 hours (or 96 hours for the  $\Delta ubiIHF$  series) in aerobic conditions (21% O<sub>2</sub>). The  
687 results shown are representative of at least two independent experiments.

688

689 **Figure 2. Complementation of *ubiH* and *ubiF* mutants by pBAD-UbiUV is *ubiT* dependent**  
690 **(and *ubiJ* independent).** *E. coli* mutant strains were transformed by pBAD24 (e.v.) and pBAD-  
691 UbiUV plasmids. After selection in the absence of O<sub>2</sub>, cultures were washed and serially  
692 diluted in minimal medium then spotted on M9 succinate plates containing 0.02% arabinose  
693 at 37°C in aerobic conditions. The results shown are representative of at least two  
694 independent experiments. **(A)** strains  $\Delta ubiJ$  (FBE514) and wt **(B)** strains  $\Delta ubiH$  (FBE253),  
695  $\Delta ubiH\Delta ubiJ$  (FBE794), and  $\Delta ubiH\Delta ubiT$  (FBE795); **(C)** strains  $\Delta ubiF$  (FBE512),  $\Delta ubiF\Delta ubiJ$   
696 (FBE264),  $\Delta ubiF\Delta ubiT$  (FBE265), and wt.

697

698 **Figure 3. UbiUV restore the UQ<sub>8</sub> content of  $\Delta ubiIH$  and  $\Delta ubiF$  mutants without using O<sub>2</sub> for**  
699 **the hydroxylation steps. (A)** UQ<sub>8</sub> content of the indicated strains containing either pBAD  
700 (e.v.), pBAD-*ubiUV*, or pBAD-*ubiU(C176A)V* after aerobic growth overnight at 37°C in LB  
701 medium. *E. coli* wt strain (MG1655) containing the empty vector was used as control. Mean  
702  $\pm$  standard deviations (SD) (n=3 to 4). \*\*\*, P < 0.001; \*\*\*\*, P < 0.0001 by unpaired Student's  
703 t test. **(B-F)** Detection of UQ<sub>8</sub> with <sup>18</sup>O<sub>2</sub> labelling. **(B)** Quantification of UQ<sub>8</sub> content in wt  
704 (MG1655) cells containing an empty vector (e.v.) and in  $\Delta ubiIH\Delta ubiF$  cells containing the  
705 pBAD-*ubiUV* vector just before (0 min) and two hours (120 min) after adding <sup>18</sup>O<sub>2</sub>. Mean  $\pm$   
706 SD (n=2). **(C to F)** Mass spectra of UQ<sub>8</sub> from cells shown in B, wt **(C and E)** and  $\Delta ubiIH\Delta ubiF$   
707 with pBAD-*ubiUV* **(D and F)**, before **(E and F)** and two hours after **(E and F)** addition of <sup>18</sup>O<sub>2</sub>.  
708 Mass spectra representative of two independent experiments.

709 **Figure 4. Fnr controls UbiTUV expression and UQ biosynthesis under anaerobiosis. (A.B).** *E.*  
710 *coli* strains UbiU-SPA, UbiV-SPA, and UbiT-SPA, and their corresponding  $\Delta fnr$  versions (strains  
711 FBE656, FBE789, FBE655, FBE695, FBE696, FBE694) were grown in LB at 37°C in +O<sub>2</sub> and -O<sub>2</sub>  
712 (A) or in +O<sub>2</sub> and 0.1% O<sub>2</sub> (B) and analyzed by Western blot: normalized quantities of total  
713 protein extracts (in biological duplicate) were separated by SDS-PAGE 12% and detected by  
714 Western-Blot using anti-Flag monoclonal antibody for the detection of the SPA tag (green) or  
715 anti-YbgF polyclonal antibodies as an internal loading control (red). (C). UQ<sub>8</sub> content of the  
716 wild type and  $\Delta fnr$  (FBE354) strains was assayed after aerobic or anaerobic growth overnight  
717 at 37°C in LB medium. Mean  $\pm$  standard deviations (SD) (n=3 to 4). \*\*\*\*, P < 0.0001 by  
718 unpaired Student's t test.

719

720 **Figure 5. (A). Organization of the promoter region of *ubiTUV* genes.** The sequence of the  
721 intergenic region between *ubiU* and *ubiT* genes is shown, from the start codon of *ubiU*, to  
722 the start codon of *ubiT* (both indicated in bold at the extremities of the sequence). The  
723 transcription start sites as determined in (19), are indicated in red. The two Fnr binding sites  
724 F1 and F2 are indicated in green. The mutF1, mutF2, and mut $\Delta$ F2 mutations introduced in  
725 the transcriptional fusions are depicted in red. (B). **Limits of transcriptional fusions used in**  
726 **panels C-E. (C-E). Activity of the transcriptional fusions with or without *fnr* expression.**  $\Delta fnr$   
727 *E. coli* strain was co-transformed by pBAD24 or pBAD-*fnr* together with the indicated  
728 transcriptional fusions. After overnight growth of 4 biological replicates at 37°C in LB in  
729 anaerobiosis, GFP levels were quantified. Errors bars indicate the standard deviation. \*, P <  
730 0.1; \*\*, P < 0.01; \*\*\*\*, P < 0.0001 by unpaired Student's t test. (F). **Role of the Fnr sites in**  
731 **UbiTUV physiological levels.** *E. coli* strains UbiV-SPA and UbiT-SPA, without (wt) or with the  
732 indicated mutation in the F1 or F2 binding sites, were grown in LB overnight at 37°C in the  
733 absence of O<sub>2</sub>. Normalized quantities of total protein extracts (in biological triplicate) were  
734 separated by 12% SDS-PAGE and detected by Western-Blot using anti-Flag monoclonal  
735 antibody for the detection of the SPA tag (green) or anti-YbgF polyclonal antibody as an  
736 internal loading control (red).

737

738 **Figure 6. Role of *ubiUVT* in anaerobic growth.** *E. coli* wt and strains devoid of the MK/DMK  
739 ( $\Delta menA$ ), UQ synthesis pathways – aerobic ( $\Delta ubiH$ ) and anaerobic ( $\Delta ubiUV$  or  $\Delta ubiT$ ) – and  
740 controls for anaerobic growth ( $\Delta fnr$ ) and auxotrophy for uracil ( $\Delta pyrD$ ) were grown

741 aerobically at 37°C in LB medium or LB glucose 0.2% (for  $\Delta menA \Delta ubiH$ ), washed and  
742 resuspended in M9 medium without carbon source to OD<sub>600</sub> 1. Serial dilutions were spotted  
743 in agarose M9 medium plates supplemented with carbon source (glycerol or glucose), KNO<sub>3</sub>  
744 or Uracil and incubated at 37°C at the indicated O<sub>2</sub> concentration until growth was observed.  
745 Experiments were performed in triplicates and confirmed with at least 4 independent  
746 biological replicates.

747

748 **Figure 7. Quinones contribute differently to colonization of the mouse gut by *E. coli*. (A).**

749 Schematic representation of the experimental protocol for the mouse intestine colonization  
750 competitions, adapted from (42). (B-C) Total CFU counts (B) and associated competitive  
751 index (C) in feces of mice after oral co-inoculation with a 1:1 ratio of MP7 wt and MP13  
752  $\Delta ubiUV$  strains. (D-E) same as B-C with MP7 wt and MP13  $\Delta menA$  strains. The limit of  
753 detection of 10<sup>2</sup> CFU is indicated as dotted line. Mean  $\pm$  standard deviations (SD), each white  
754 circle represents values for individual mice (n=5 and 8), circles missing corresponds to the  
755 absence of feces for that day. ns, not significant; \*, P < 0.05; \*\*, P < 0.01; \*\*\*, P < 0.001;  
756 \*\*\*\*, P < 0.0001 by one-sample t test. Changes in total CFU counts and CI throughout the  
757 experiment in each mouse are shown in Figure S6.

758

759 **Figure 8. Role of *ubiUVT* in the anaerobic to aerobic transition. (A).** *E. coli* wt and strains

760 devoid of the MK/DMK ( $\Delta menA$ ) and UQ aerobic ( $\Delta ubiH$ ) and anaerobic ( $\Delta ubiUV$  or  $\Delta ubiT$ )  
761 synthesis pathways, were grown anaerobically in LB KNO<sub>3</sub> medium, washed in M9 medium  
762 without carbon source and resuspended in M9 succinate medium to OD<sub>600</sub>=0.02. Growth  
763 was followed aerobically at 37°C in a TECAN microplate reader in 3 independent  
764 experiments. At 40 hours of growth, cells were diluted 1/100 in the same medium (refresh)  
765 and growth was resumed for 20h more. (B). *E. coli* wt (MG1655),  $\Delta ubiUV$  and  $\Delta ubiT$  strains  
766 were cultured anaerobically in LB medium containing NO<sub>3</sub><sup>-</sup> as final electron acceptor until OD  
767 ~ 1. After 20 min of treatment with chloramphenicol (+Clp) at 200  $\mu$ g/mL or without  
768 chloramphenicol (-Clp) under anaerobic conditions, the cultures were shifted to ambient air  
769 for a two-hour incubation. UQ<sub>8</sub> content was quantified before (0 min) or after oxic transition  
770 (30 min and 120 min) by HPLC-ECD of lipid extracts from 1 mg of cells. Quantifications are  
771 expressed as picomole per milligram of cells (n=4 biological replicates). \*\*, P < 0.01; \*\*\*, P <  
772 0.001 by unpaired Student's t test. Mean  $\pm$  standard deviation is indicated.



773

774 **Figure S1. O<sub>2</sub>-dependent and O<sub>2</sub>-independent biosynthetic pathways of UQ in *E. coli*.** R,  
775 octaprenyl chain illustrated on the UQ<sub>8</sub> structure; 4-HB, 4-hydroxybenzoic acid; OPP, 3-  
776 octaprenylphenol; DMQ<sub>8</sub>, C-6-demethoxyubiquinone; DMAPP, dimethylallyl pyrophosphate;  
777 IPP, isopentenyl pyrophosphate. The Ubi-enzymes and accessory factors common between  
778 the two pathways are in black, those corresponding to the aerobic pathway in red, and those  
779 corresponding to the anaerobic pathway are in blue. Hydroxyl groups added on C5, C1, and  
780 C6 are highlighted in red.

781

782 **Figure S2. Amount of UbiV-SPA produced in +O<sub>2</sub> from pBAD-UbiUV-SPA plasmid compared**  
783 **with physiological amount in -O<sub>2</sub> of chromosome-encoded UbiV-SPA.** Strain UbiV-SPA  
784 (FBE789) was grown in LB in the absence of O<sub>2</sub>. Wild type *E. coli* transformed by pBAD-  
785 UbiUV-SPA (pES184) was grown in LB in +O<sub>2</sub> and induced 2 hours with 0.02% arabinose.  
786 After preparation of whole cell extract, the sample was diluted 2-fold serially (1 to 1/32).  
787 Western blot was performed using an anti-Flag antibody. ni : uninduced cells.

788

789 **Figure S3.** Ubiquinone 8 (UQ<sub>8</sub>), demethylmenaquinone 8 (DMK<sub>8</sub>) and menaquinone 8 (MK<sub>8</sub>)  
790 content in the indicated mutant strains of the Keio collection (37) after anaerobic growth  
791 overnight at 37°C in LB medium. Mean ± standard deviations (SD) (n=2).

792

793 **Figure S4. Comparison of UbiT-SPA levels in the regulation mutants in -O<sub>2</sub> and in +O<sub>2</sub>.** *E.*  
794 *coli* strains expressing UbiT-SPA with or without the  $\Delta fnr$  or  $mut\Delta F2$  chromosomal mutations  
795 (FBE655, FBE694, and FBE883) were grown in biological duplicates in LB at 37°C in the  
796 indicated oxygenic conditions until OD<sub>600nm</sub>=1. Normalized quantities of total protein  
797 extracts in duplicate were separated by SDS-PAGE 12% and detected by Western-Blot using  
798 anti-Flag monoclonal antibody for the detection of the SPA tag or anti-YbgF polyclonal  
799 antibodies as an internal loading control.

800

801 **Figure S5. (A)** Ubiquinone 8 (UQ<sub>8</sub>), **(B)** demethylmenaquinone 8 (DMK<sub>8</sub>) and **(C)**  
802 menaquinone 8 (MK<sub>8</sub>) content in MP7 wt, MP13  $\Delta ubiUV$ , MP13  $\Delta menA$  strains after  
803 anaerobic **(A)** and aerobic **(B and C)** growth overnight at 37°C in LB medium. Mean ±  
804 standard deviations (SD) (n=2). N.D., not detected.

805

806 **Figure S6.** Total CFU count per gram of feces (**A and B**) and competitive index (**C and D**) for  
807 either MP7 (mCherry-tagged MP1) WT:MP13 (GFP-tagged MP1)  $\Delta ubiUV$  (**A and C**) or MP7  
808 WT:MP13  $\Delta menA$  (**B and D**) competition experiments in each mouse of the experiments  
809 shown in Figure 7. The limit of detection was  $10^2$  CFU. The absence of total CFU count in one  
810 day corresponds to the absence of feces for that day.

811

812 **Figure S7. Protein levels of UbiHF proteins in aerobic and anaerobic conditions.** Strains  
813 producing UbiI, UbiH, and UbiF tagged with SPA at the chromosome, were grown in LB in  
814 aerobic and anaerobic conditions. Whole cell extracts were analyzed by Western blot with  
815 an anti-Flag antibody. Results representative of two independent experiments.

816

817 **Figure S8. *ubiT* is in operon with the unknown function *yhbS* gene. (A).** Genetic  
818 organization. See legend of figure 5. **(B).** RT-PCRs were performed on total RNA prepared on  
819 MG1655 cells in exponential phase, with oligonucleotides ebp275 and ebp285 (Table 3). The  
820 positions of hybridization of the oligonucleotides are indicated in panel A. +/- RT indicates  
821 the absence or presence of the reverse transcriptase (RT) enzyme in the reaction mixture. A  
822 control PCR was performed on genomic DNA with the same oligonucleotides. **(C).** *E. coli*  
823 strains YhbS-SPA and  $\Delta fnr$ /YhbS-SPA (FBE855, FBE856) were grown in LB at 37°C in the  
824 indicated oxygenic conditions until  $OD_{600nm}=1$ . Normalized quantities of total protein  
825 extracts in duplicate were separated by SDS-PAGE 12% and detected by Western-Blot using  
826 anti-Flag monoclonal antibody for the detection of the SPA tag. **D.** The indicated *E. coli*  
827 strains were grown anaerobically for two days at 37°C on M9 medium plates supplemented  
828 with 0.2% glycerol and  $NO_3^-$ .

829

830 REFERENCES

831

- 832 1. Kawamukai, M. 2018. Biosynthesis and applications of prenylquinones. *Biosci*  
833 *Biotechnol Biochem* 82:963–977.
- 834 2. Franza, T, Gaudu, P. 2022. Quinones: more than electron shuttles. *Res Microbiol*  
835 173:103953.
- 836 3. Pelosi, L, Vo, CD, Abby, SS, Loiseau, L, Rascalou, B, Hajj Chehade, M, Faivre, B,  
837 Goussé, M, Chenal, C, Touati, N, Binet, L, Cornu, D, Fyfe, CD, Fontecave, M, Barras,  
838 F, Lombard, M, Pierrel, F. 2019. Ubiquinone Biosynthesis over the Entire O<sub>2</sub> Range:  
839 Characterization of a Conserved O<sub>2</sub>-Independent Pathway. *mBio* 10
- 840 4. Abby, SS, Kazemzadeh, K, Vragniau, C, Pelosi, L, Pierrel, F. 2020. Advances in  
841 bacterial pathways for the biosynthesis of ubiquinone. *Biochim Biophys Acta Bioenerg*  
842 1861:148259.
- 843 5. Alexander, K, Young, IG. 1978. Three hydroxylations incorporating molecular oxygen  
844 in the aerobic biosynthesis of ubiquinone in *Escherichia coli*. *Biochemistry* 17:4745–  
845 4750.
- 846 6. Hajj Chehade, M, Loiseau, L, Lombard, M, Pecqueur, L, Ismail, A, Smadja, M,  
847 Golinelli-Pimpaneau, B, Mellot-Draznieks, C, Hamelin, O, Aussel, L, Kieffer-Jaquinod,  
848 S, Labessan, N, Barras, F, Fontecave, M, Pierrel, F. 2013. *ubiI*, a new gene in  
849 *Escherichia coli* coenzyme Q biosynthesis, is involved in aerobic C5-hydroxylation. *J*  
850 *Biol Chem* 288:20085–20092.
- 851 7. Kwon, O, Kotsakis, A, Meganathan, R. 2000. Ubiquinone (coenzyme Q) biosynthesis in  
852 *Escherichia coli*: identification of the *ubiF* gene. *FEMS Microbiol Lett* 186:157–161.
- 853 8. Asquith, CRM, Murray, NH, Pagliarini, DJ. 2019. ADCK3/COQ8A: the choice target of  
854 the UbiB protein kinase-like family. *Nat Rev Drug Discov* 18:815.
- 855 9. Hajj Chehade, M, Pelosi, L, Fyfe, CD, Loiseau, L, Rascalou, B, Brugière, S,  
856 Kazemzadeh, K, Vo, CD, Ciccone, L, Aussel, L, Couté, Y, Fontecave, M, Barras, F,  
857 Lombard, M, Pierrel, F. 2019. A Soluble Metabolon Synthesizes the Isoprenoid Lipid  
858 Ubiquinone. *Cell Chem Biol* 26:482–492.e7.
- 859 10. Sakai, Y, Kimura, S, Suzuki, T. 2019. Dual pathways of tRNA hydroxylation ensure  
860 efficient translation by expanding decoding capability. *Nat Commun* 10:2858.
- 861 11. Kimura, S, Sakai, Y, Ishiguro, K, Suzuki, T. 2017. Biogenesis and iron-dependency of  
862 ribosomal RNA hydroxylation. *Nucleic Acids Res* 45:12974–12986.
- 863 12. Lauhon, CT. 2019. Identification and Characterization of Genes Required for 5-  
864 Hydroxyuridine Synthesis in *Bacillus subtilis* and *Escherichia coli* tRNA. *J Bacteriol*  
865 201:e00433–19.
- 866 13. Pelosi, L, Ducluzeau, AL, Loiseau, L, Barras, F, Schneider, D, Junier, I, Pierrel, F.  
867 2016. Evolution of Ubiquinone Biosynthesis: Multiple Proteobacterial Enzymes with  
868 Various Regioselectivities To Catalyze Three Contiguous Aromatic Hydroxylation  
869 Reactions. *mSystems* 1:e00091–16.
- 870 14. Agrawal, S, Jaswal, K, Shiver, AL, Balecha, H, Patra, T, Chaba, R. 2017. A genome-  
871 wide screen in *Escherichia coli* reveals that ubiquinone is a key antioxidant for  
872 metabolism of long-chain fatty acids. *J Biol Chem* 292:20086–20099.
- 873 15. Esquilin-Lebron, K, Dubrac, S, Barras, F, Boyd, JM. 2021. Bacterial Approaches for  
874 Assembling Iron-Sulfur Proteins. *mBio* 12:e0242521.
- 875 16. Myers, KS, Yan, H, Ong, IM, Chung, D, Liang, K, Tran, F, Keleş, S, Landick, R, Kiley,  
876 PJ. 2013. Genome-scale analysis of *Escherichia coli* FNR reveals complex features of  
877 transcription factor binding. *PLoS Genet* 9:e1003565.

- 878 17. Federowicz, S, Kim, D, Ebrahim, A, Lerman, J, Nagarajan, H, Cho, BK, Zengler, K,  
879 Palsson, B. 2014. Determining the control circuitry of redox metabolism at the genome-  
880 scale. *PLoS Genet* 10:e1004264.
- 881 18. Zeghouf, M, Li, J, Butland, G, Borkowska, A, Canadien, V, Richards, D, Beattie, B,  
882 Emili, A, Greenblatt, JF. 2004. Sequential Peptide Affinity (SPA) system for the  
883 identification of mammalian and bacterial protein complexes. *J Proteome Res* 3:463–  
884 468.
- 885 19. Thomason, MK, Bischler, T, Eisenbart, SK, Förstner, KU, Zhang, A, Herbig, A, Nieselt,  
886 K, Sharma, CM, Storz, G. 2015. Global transcriptional start site mapping using  
887 differential RNA sequencing reveals novel antisense RNAs in *Escherichia coli*. *J*  
888 *Bacteriol* 197:18–28.
- 889 20. Zaslaver, A, Bren, A, Ronen, M, Itzkovitz, S, Kikoin, I, Shavit, S, Liebermeister, W,  
890 Surette, MG, Alon, U. 2006. A comprehensive library of fluorescent transcriptional  
891 reporters for *Escherichia coli*. *Nat Methods* 3:623–628.
- 892 21. Nitzschke, A, Bettenbrock, K. 2018. All three quinone species play distinct roles in  
893 ensuring optimal growth under aerobic and fermentative conditions in *E. coli* K12.  
894 *PLoS One* 13:e0194699.
- 895 22. Tseng, CP, Albrecht, J, Gunsalus, RP. 1996. Effect of microaerophilic cell growth  
896 conditions on expression of the aerobic (*cyoABCDE* and *cydAB*) and anaerobic  
897 (*narGHJI*, *frdABCD*, and *dmsABC*) respiratory pathway genes in *Escherichia coli*. *J*  
898 *Bacteriol* 178:1094–1098.
- 899 23. Lambden, PR, Guest, JR. 1976. Mutants of *Escherichia coli* K12 unable to use fumarate  
900 as an anaerobic electron acceptor. *J Gen Microbiol* 97:145–160.
- 901 24. Wallace, BJ, Young, IG. 1977. Role of quinones in electron transport to oxygen and  
902 nitrate in *Escherichia coli*. Studies with a *ubiA*- *menA*- double quinone mutant.  
903 *Biochim Biophys Acta* 461:84–100.
- 904 25. Sharma, P, Teixeira de Mattos, MJ, Hellingwerf, KJ, Bekker, M. 2012. On the function  
905 of the various quinone species in *Escherichia coli*. *FEBS J* 279:3364–3373.
- 906 26. Newton, NA, Cox, GB, Gibson, F. 1971. The function of menaquinone (vitamin K 2) in  
907 *Escherichia coli* K-12. *Biochim Biophys Acta* 244:155–166.
- 908 27. Lasaro, M, Liu, Z, Bishar, R, Kelly, K, Chattopadhyay, S, Paul, S, Sokurenko, E, Zhu, J,  
909 Goulian, M. 2014. *Escherichia coli* isolate for studying colonization of the mouse  
910 intestine and its application to two-component signaling knockouts. *J Bacteriol*  
911 196:1723–1732.
- 912 28. Jones, SA, Gibson, T, Maltby, RC, Chowdhury, FZ, Stewart, V, Cohen, PS, Conway, T.  
913 2011. Anaerobic respiration of *Escherichia coli* in the mouse intestine. *Infect Immun*  
914 79:4218–4226.
- 915 29. Chen, J, To, L, de Mets, F, Luo, X, Majdalani, N, Tai, CH, Gottesman, S. 2021. A  
916 fluorescence-based genetic screen reveals diverse mechanisms silencing small RNA  
917 signaling in *E. coli*. *Proc Natl Acad Sci U S A* 118
- 918 30. Lee, JY, Tsolis, RM, Bäumlér, AJ. 2022. The microbiome and gut homeostasis. *Science*  
919 377:eabp9960.
- 920 31. Knoell, HE. 1981. Stand-by position of the dioxygen-dependent ubiquinone-8 synthesis  
921 apparatus in anaerobically grown *Escherichia coli* K-12. *FEMS Microbiology Letters*  
922 10:59–62.
- 923 32. Vo, CD, Michaud, J, Elsen, S, Faivre, B, Bouveret, E, Barras, F, Fontecave, M, Pierrel,  
924 F, Lombard, M, Pelosi, L. 2020. The O<sub>2</sub>-independent pathway of ubiquinone  
925 biosynthesis is essential for denitrification in *Pseudomonas aeruginosa*. *J Biol Chem*  
926 295:9021–9032.

- 927 33. Cecchini, G, Schröder, I, Gunsalus, RP, Maklashina, E. 2002. Succinate dehydrogenase  
928 and fumarate reductase from *Escherichia coli*. *Biochim Biophys Acta* 1553:140–157.
- 929 34. Möbius, K, Arias-Cartin, R, Breckau, D, Hännig, AL, Riedmann, K, Biedendieck, R,  
930 Schröder, S, Becher, D, Magalon, A, Moser, J, Jahn, M, Jahn, D. 2010. Heme  
931 biosynthesis is coupled to electron transport chains for energy generation. *Proc Natl*  
932 *Acad Sci U S A* 107:10436–10441.
- 933 35. Jones, SA, Chowdhury, FZ, Fabich, AJ, Anderson, A, Schreiner, DM, House, AL,  
934 Autieri, SM, Leatham, MP, Lins, JJ, Jorgensen, M, Cohen, PS, Conway, T. 2007.  
935 Respiration of *Escherichia coli* in the mouse intestine. *Infect Immun* 75:4891–4899.
- 936 36. Hughes, ER, Winter, MG, Duerkop, BA, Spiga, L, Furtado de Carvalho, T, Zhu, W,  
937 Gillis, CC, Büttner, L, Smoot, MP, Behrendt, CL, Cherry, S, Santos, RL, Hooper, LV,  
938 Winter, SE. 2017. Microbial Respiration and Formate Oxidation as Metabolic  
939 Signatures of Inflammation-Associated Dysbiosis. *Cell Host Microbe* 21:208–219.
- 940 37. Baba, T, Ara, T, Hasegawa, M, Takai, Y, Okumura, Y, Baba, M, Datsenko, KA,  
941 Tomita, M, Wanner, BL, Mori, H. 2006. Construction of *Escherichia coli* K-12 in-  
942 frame, single-gene knockout mutants: the Keio collection. *Mol Syst Biol* 2:2006.0008.
- 943 38. Datsenko, KA, Wanner, BL. 2000. One-step inactivation of chromosomal genes in  
944 *Escherichia coli* K-12 using PCR products. *Proc Natl Acad Sci U S A* 97:6640–6645.
- 945 39. Cherepanov, PP, Wackernagel, W. 1995. Gene disruption in *Escherichia coli*: TcR and  
946 KmR cassettes with the option of Flp-catalyzed excision of the antibiotic-resistance  
947 determinant. *Gene* 158:9–14.
- 948 40. Link, AJ, Phillips, D, Church, GM. 1997. Methods for generating precise deletions and  
949 insertions in the genome of wild-type *Escherichia coli*: application to open reading  
950 frame characterization. *J Bacteriol* 179:6228–6237.
- 951 41. Guzman, LM, Belin, D, Carson, MJ, Beckwith, J. 1995. Tight regulation, modulation,  
952 and high-level expression by vectors containing the arabinose PBAD promoter. *J*  
953 *Bacteriol* 177:4121–4130.
- 954 42. Samuels, AN, Roggiani, M, Zhu, J, Goulian, M, Kohli, RM. 2019. The SOS Response  
955 Mediates Sustained Colonization of the Mammalian Gut. *Infect Immun* 87:e00711–18.
- 956 43. Samuels, AN, Roggiani, M, Smith, KA, Zhu, J, Goulian, M, Kohli, RM. 2020.  
957 Deciphering the Role of Colicins during Colonization of the Mammalian Gut by  
958 Commensal *E. coli*. *Microorganisms* 8:E664.
- 959 44. Mettert, EL, Kiley, PJ. 2007. Contributions of [4Fe-4S]-FNR and integration host factor  
960 to *fnr* transcriptional regulation. *J Bacteriol* 189:3036–3043.
- 961 45. Loiseau, L, Fyfe, C, Aussel, L, Hajj Chehade, M, Hernández, SB, Faivre, B, Hamdane,  
962 D, Mellot-Draznieks, C, Rascalou, B, Pelosi, L, Velours, C, Cornu, D, Lombard, M,  
963 Casadesús, J, Pierrel, F, Fontecave, M, Barras, F. 2017. The UbiK protein is an  
964 accessory factor necessary for bacterial ubiquinone (UQ) biosynthesis and forms a  
965 complex with the UQ biogenesis factor UbiJ. *J Biol Chem* 292:11937–11950.
- 966 46. Aussel, L, Loiseau, L, Hajj Chehade, M, Pocachard, B, Fontecave, M, Pierrel, F, Barras,  
967 F. 2014. *ubiJ*, a new gene required for aerobic growth and proliferation in macrophage,  
968 is involved in coenzyme Q biosynthesis in *Escherichia coli* and *Salmonella enterica*  
969 serovar Typhimurium. *J Bacteriol* 196:70–79.
- 970

**A**

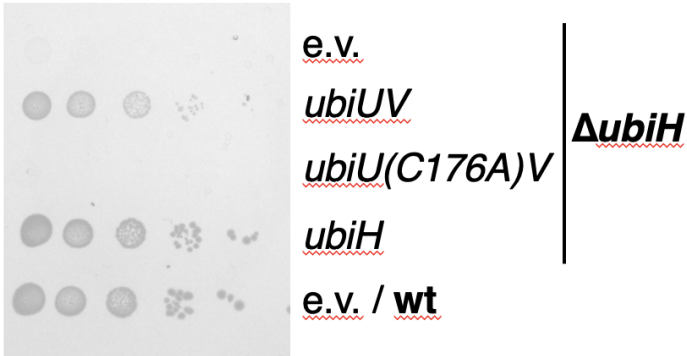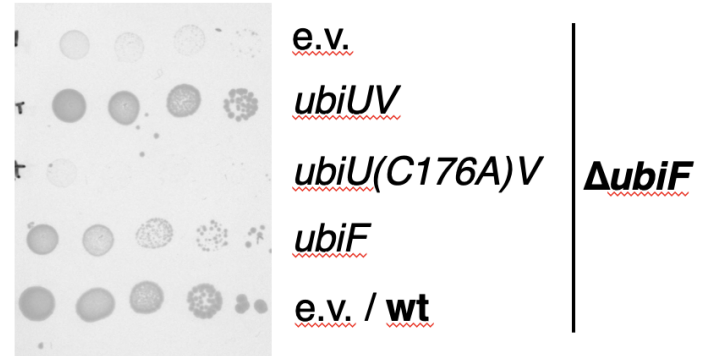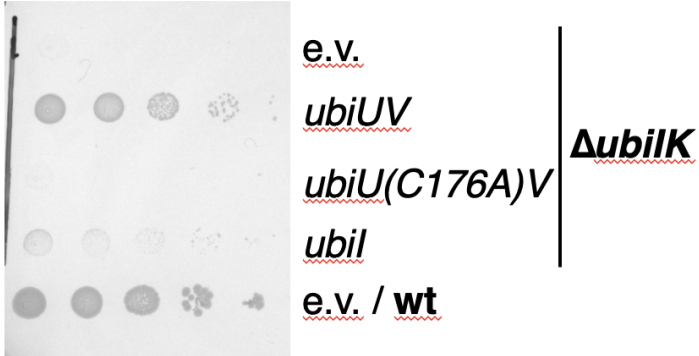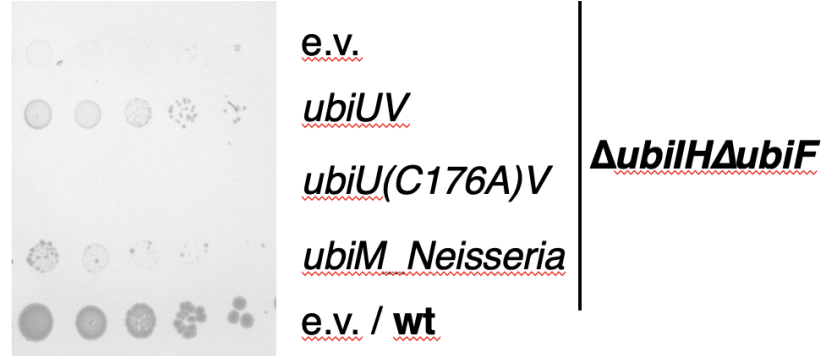

**B**

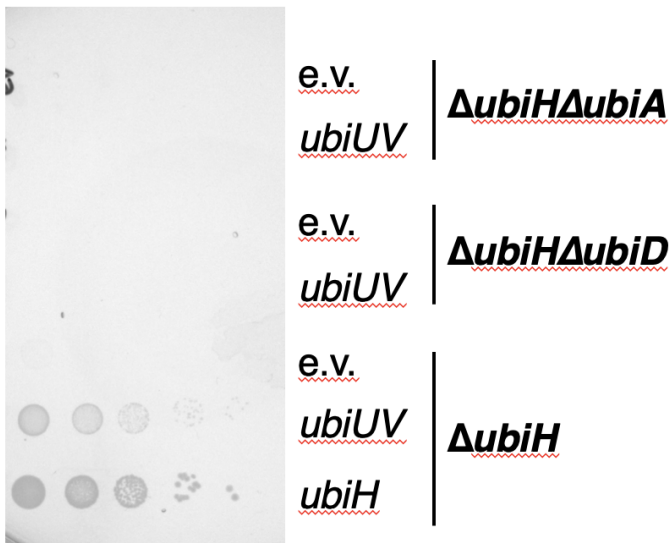



**A**

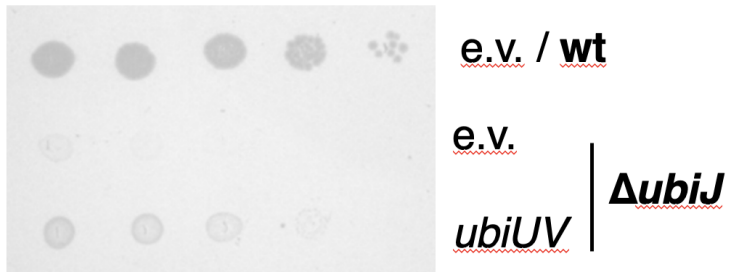

**B**

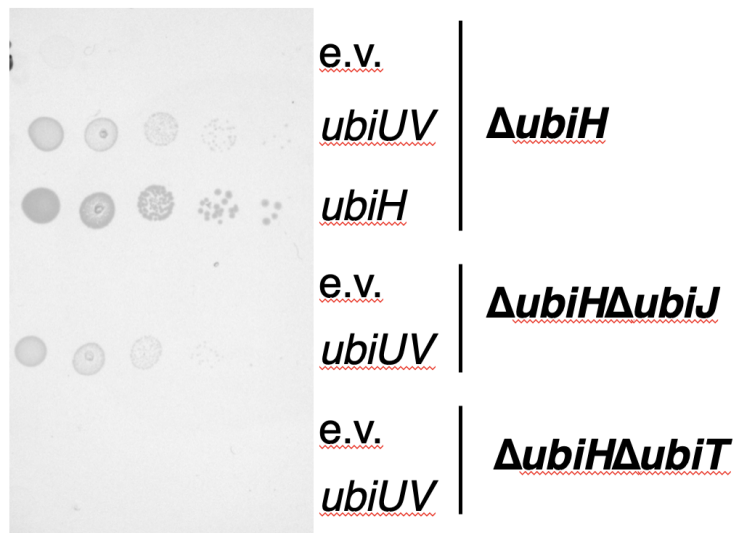

**C**

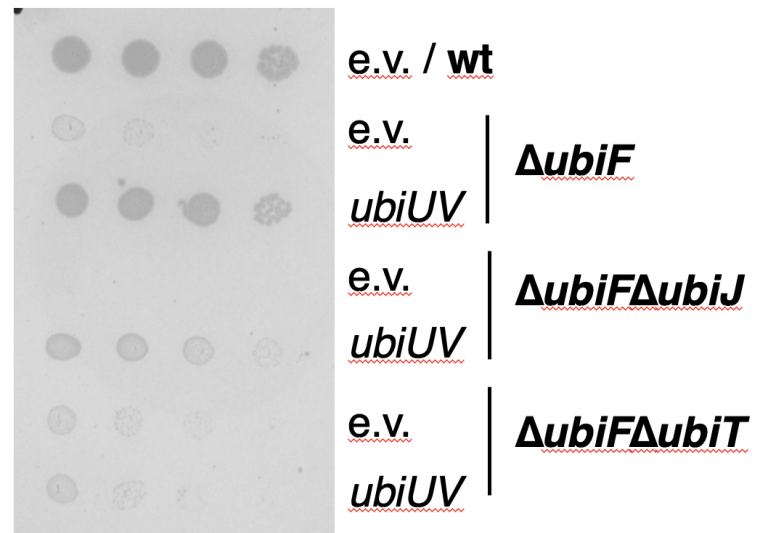

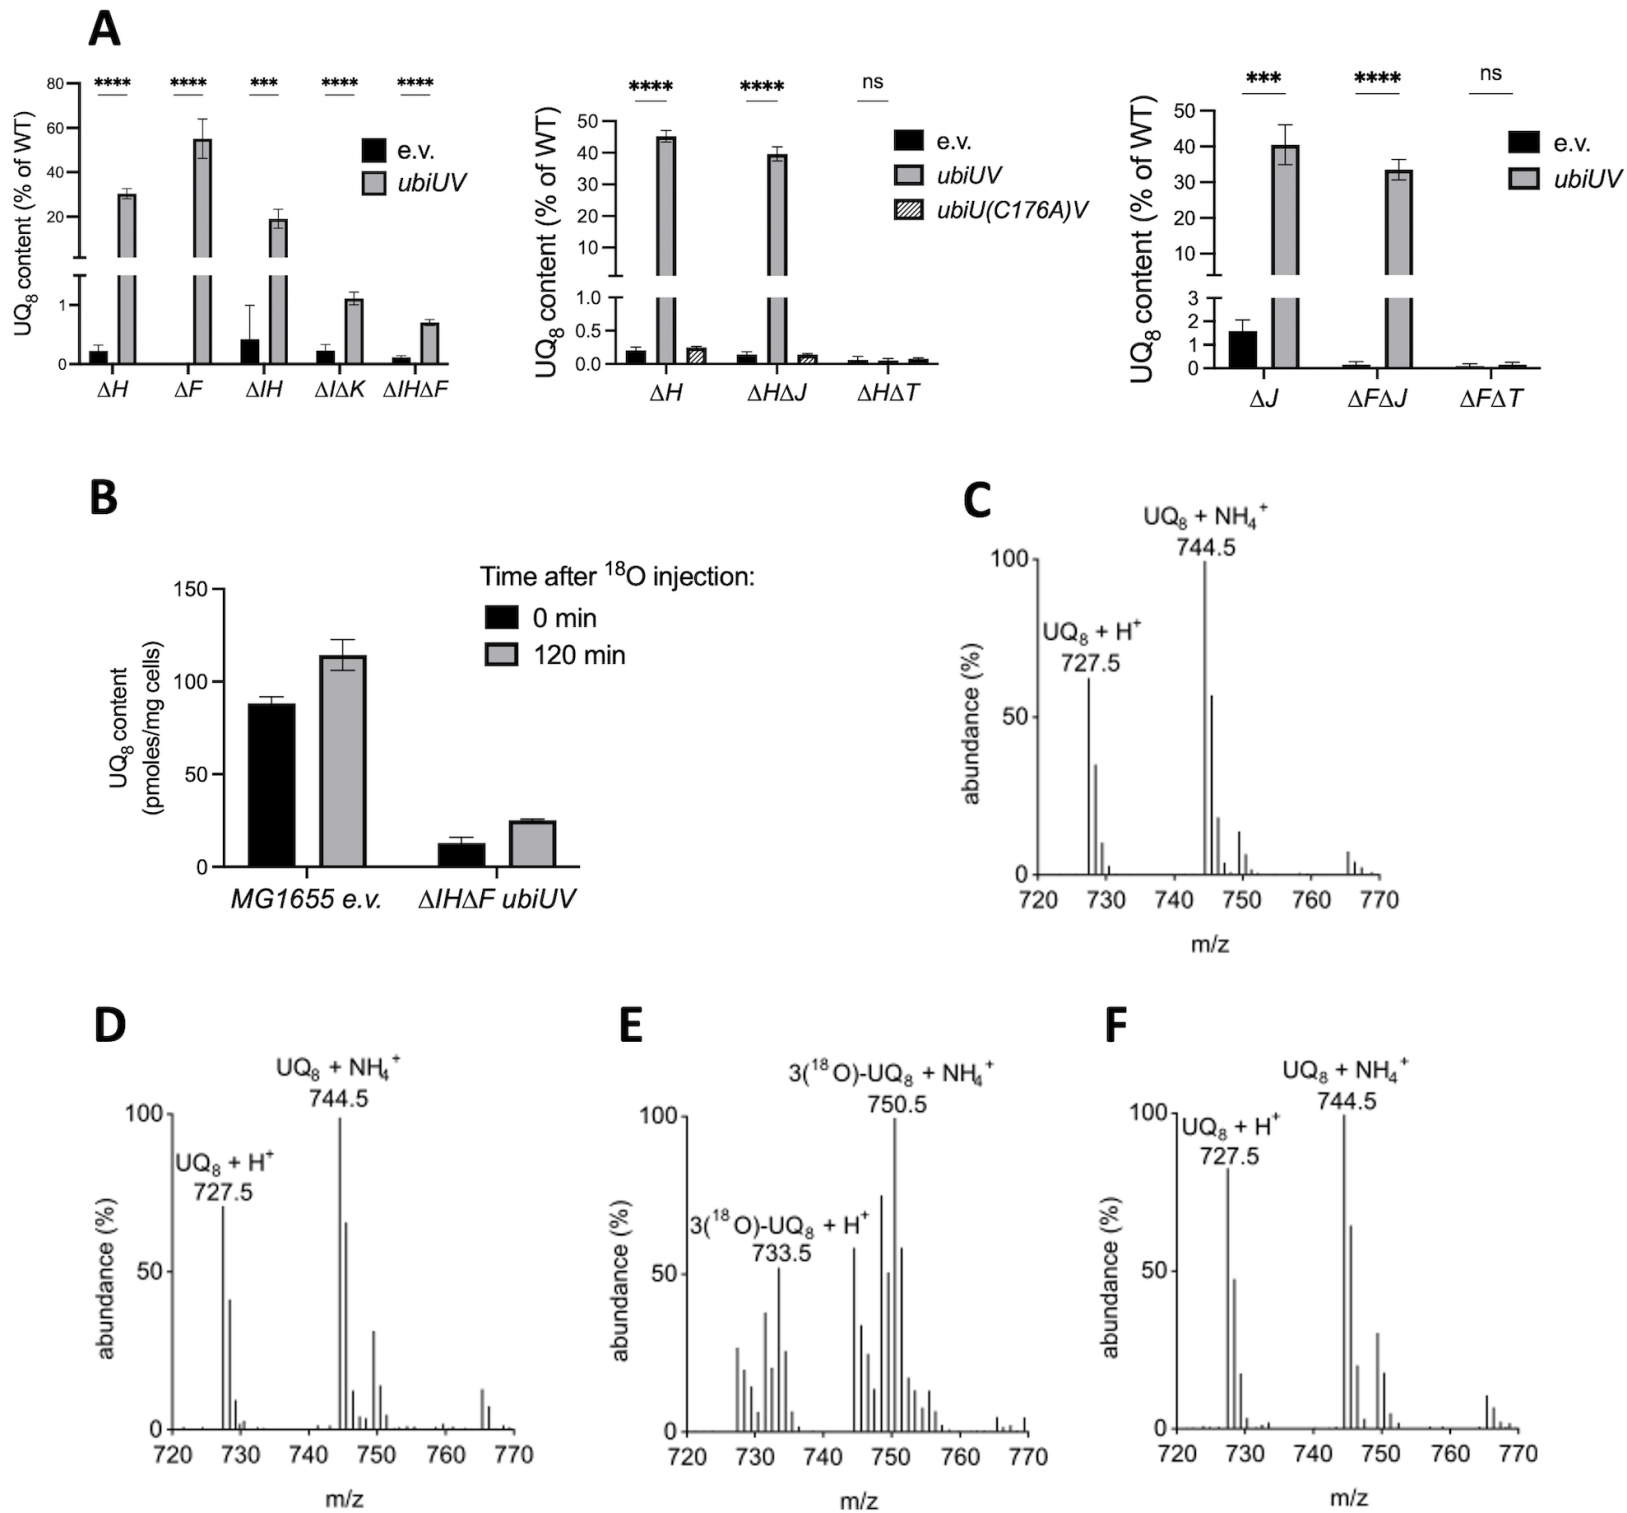



**A**

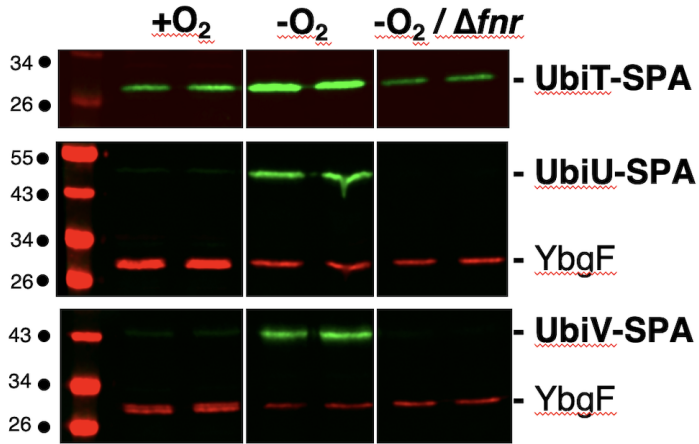

**B**

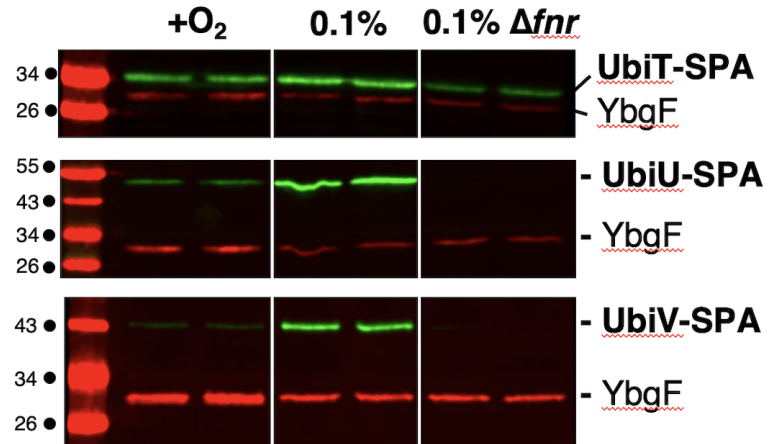

**C**

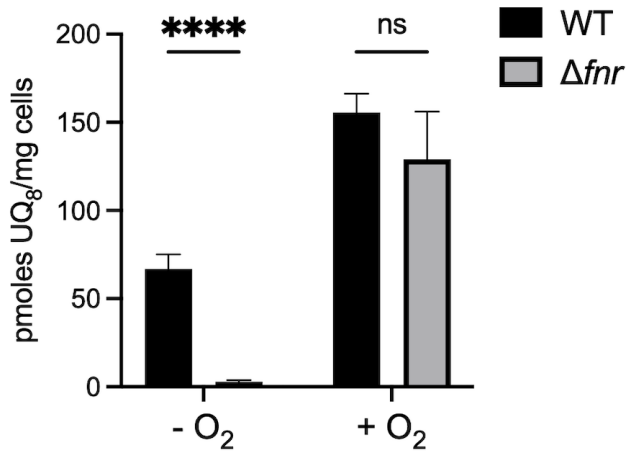

**A**

1 **cat**AATTTTCTCTGAAGGTTGCGCTATCAAACGCAAAAATGTTAA**C**GAACTGGGATTTTAGTTA  
 66 ACCTTGCTGCGACAATTT**TTGATTTAAGGCAG**TTAAAGTTGTATTGGTGGTAGC**A**GCAATTT**CAT**  
 131 ATGGAATTG**TTGATTTATACCGC**TATGTTATTTTTCTGATATGGCAAAAATAGGATG**A**TTGTTGAA  
 196 ACAGGGAGTAAAACTC**gta**

*ubiUVp* ←  
 → *ubiTp1*  
 → *ubiTp2*

F1 site  
 mutF1: GATGA

F2 site  
 mutF2: CATGA  
 mutΔF2

**B**

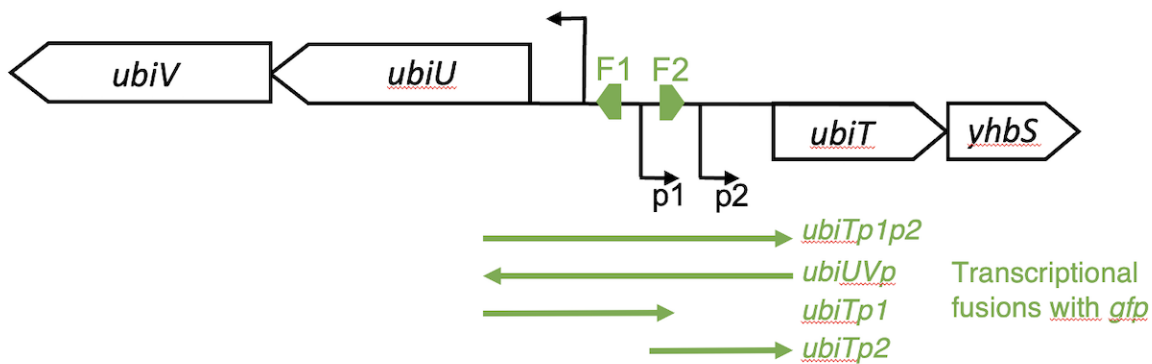

**C**

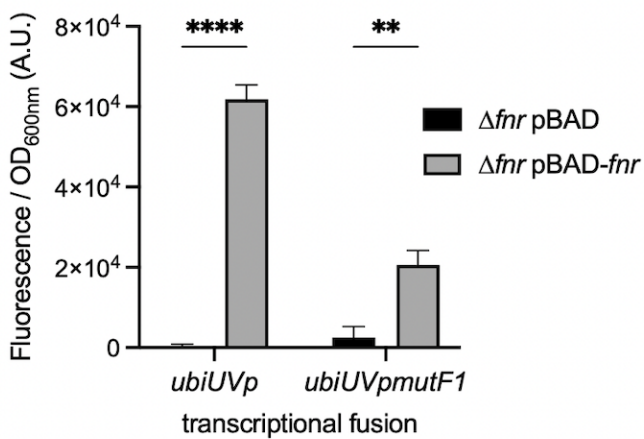

**D**

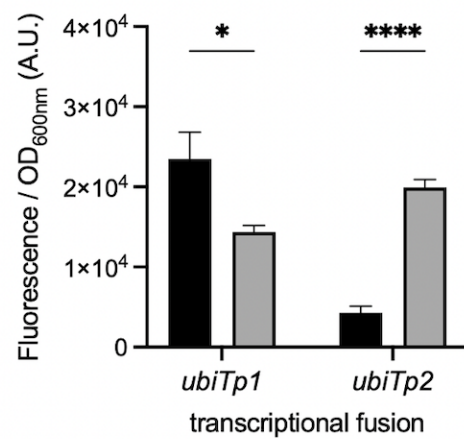

**E**

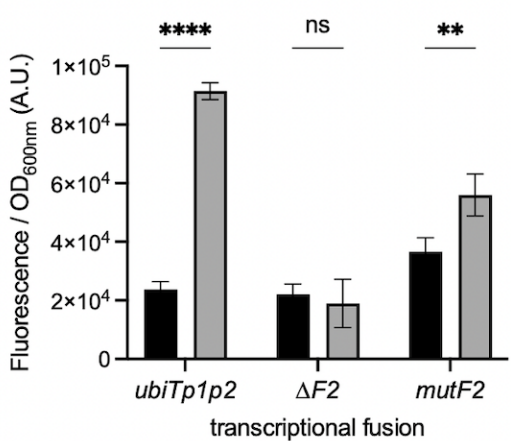

**F**

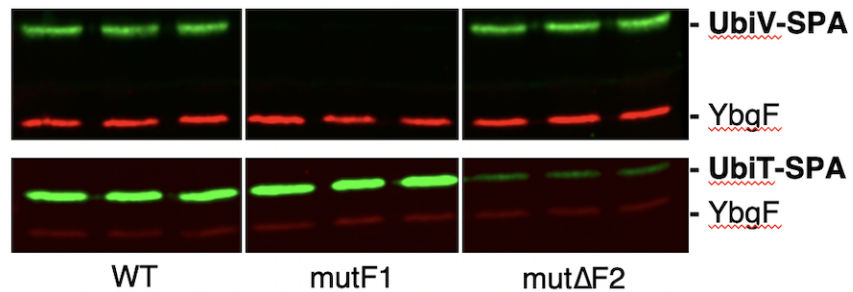

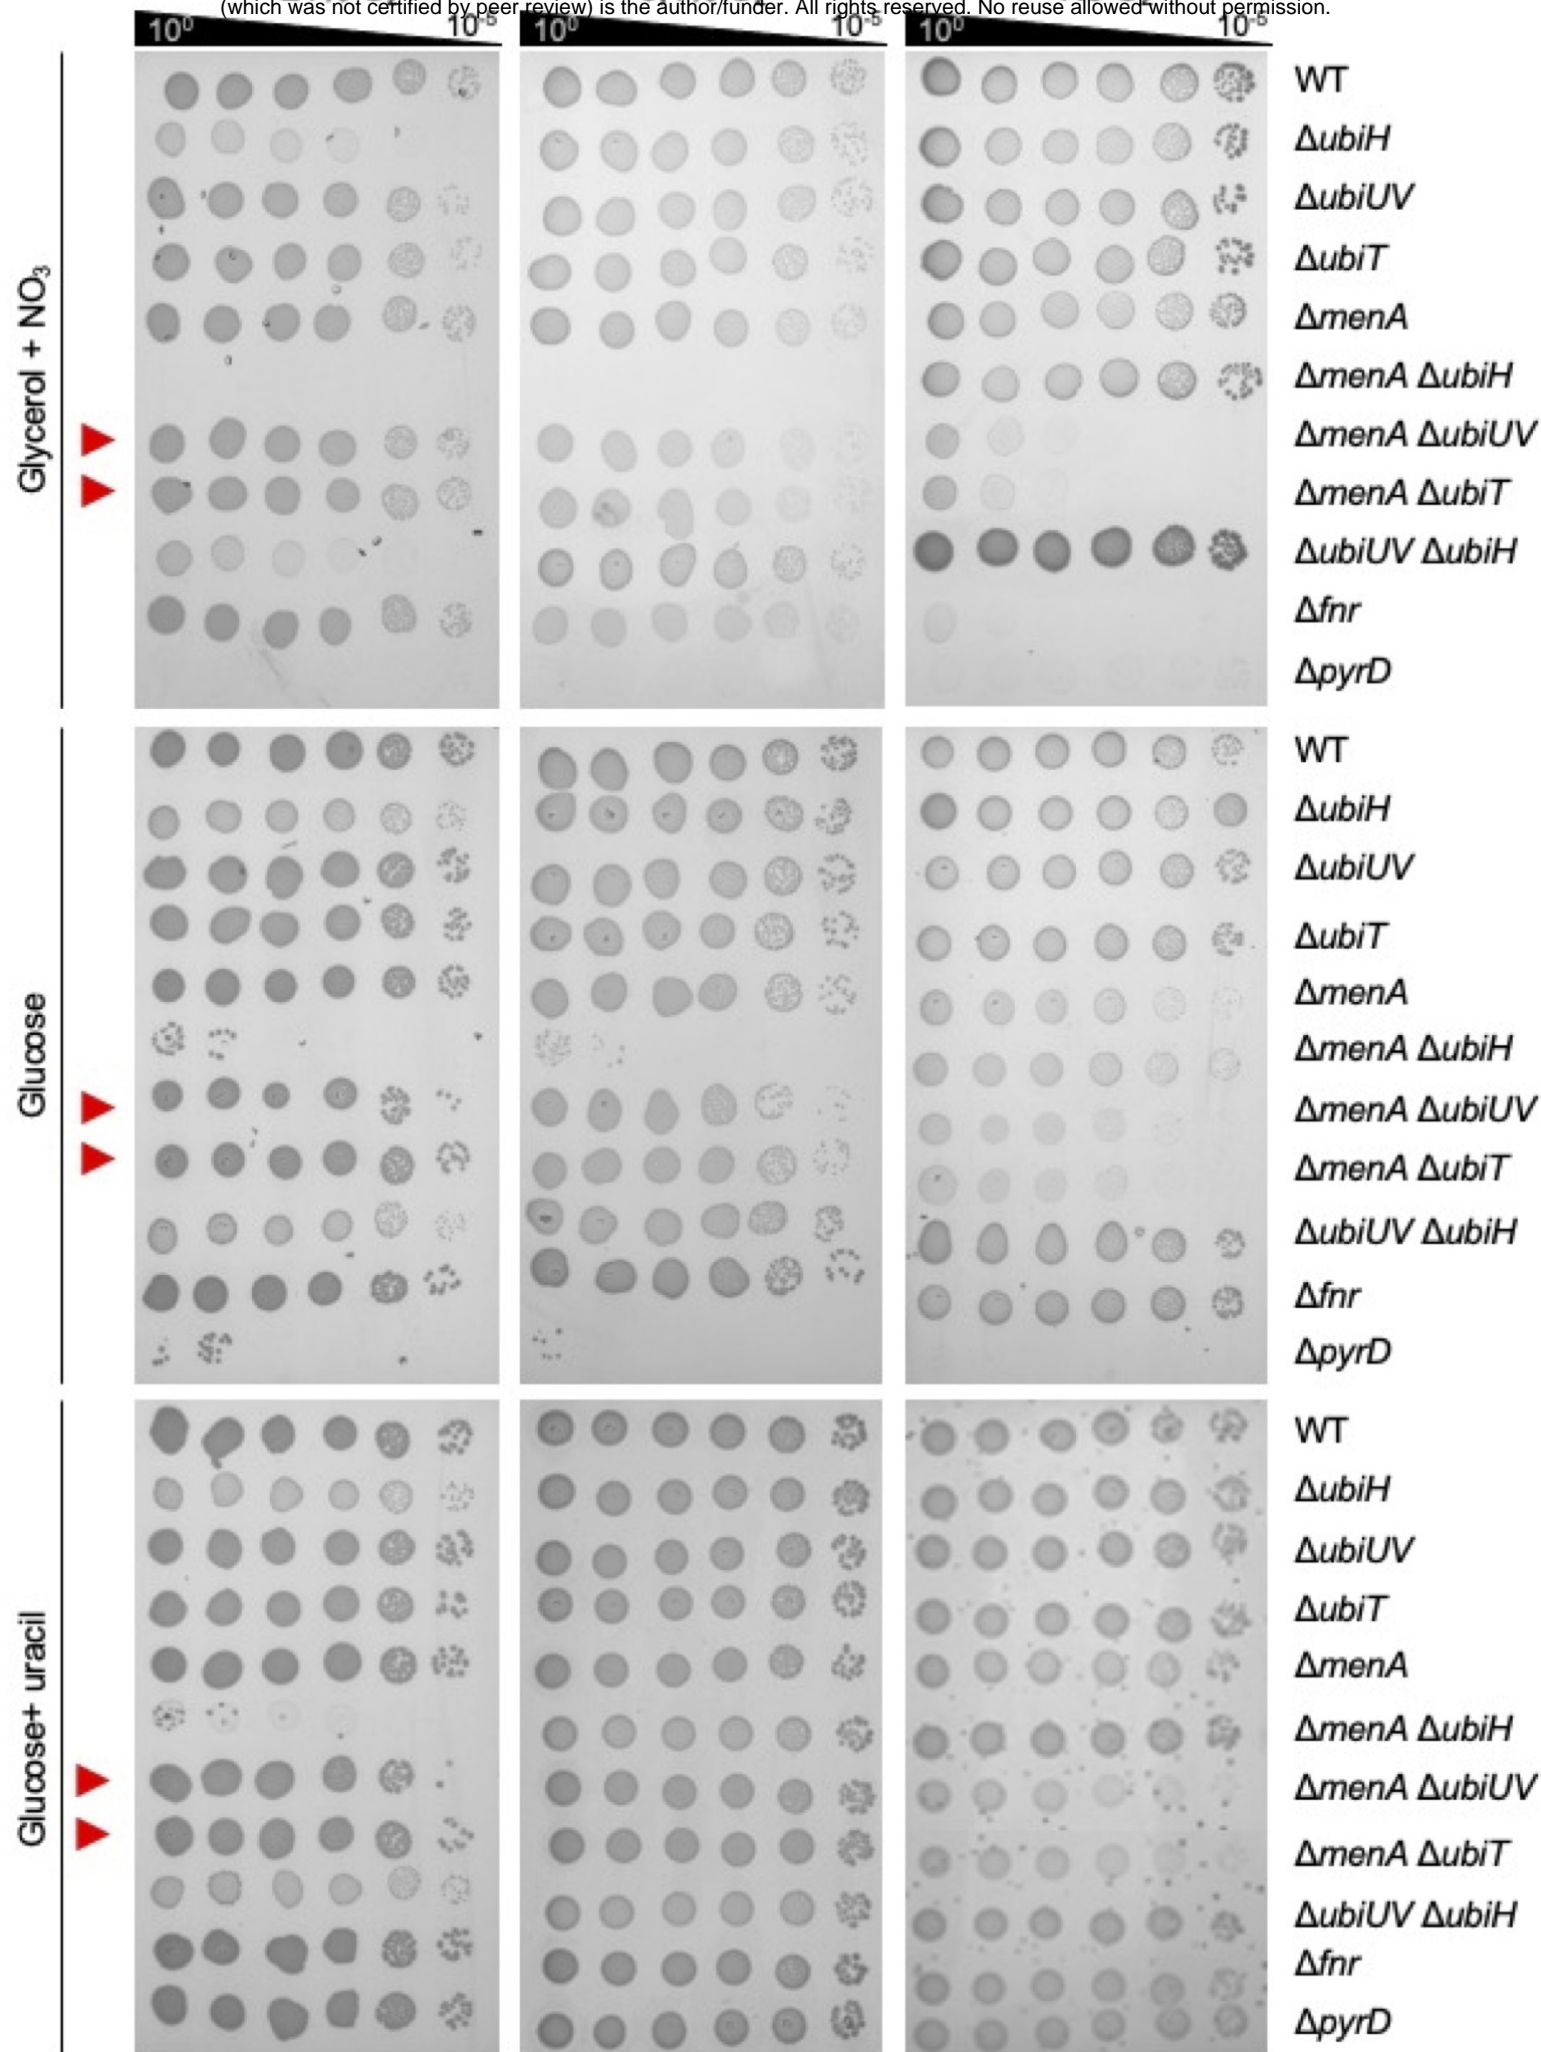

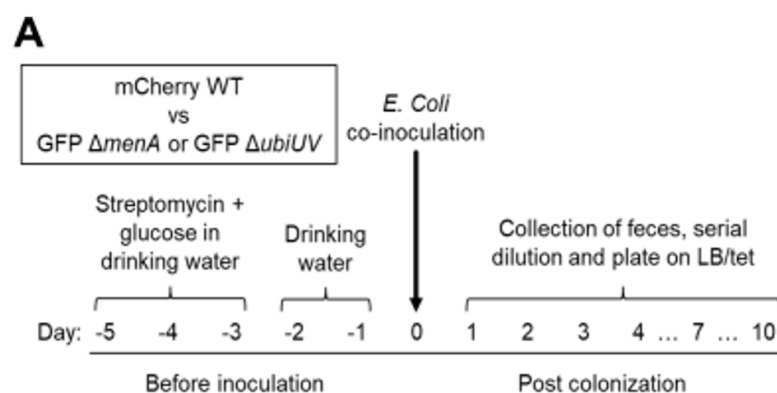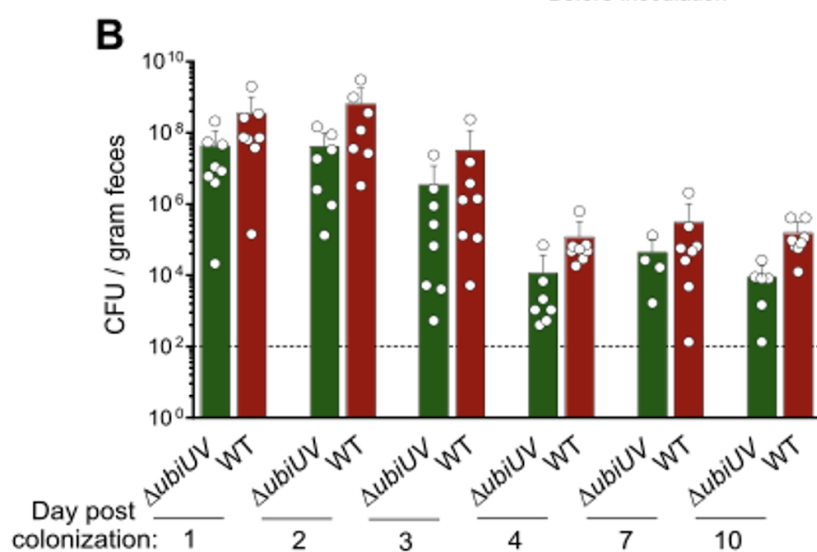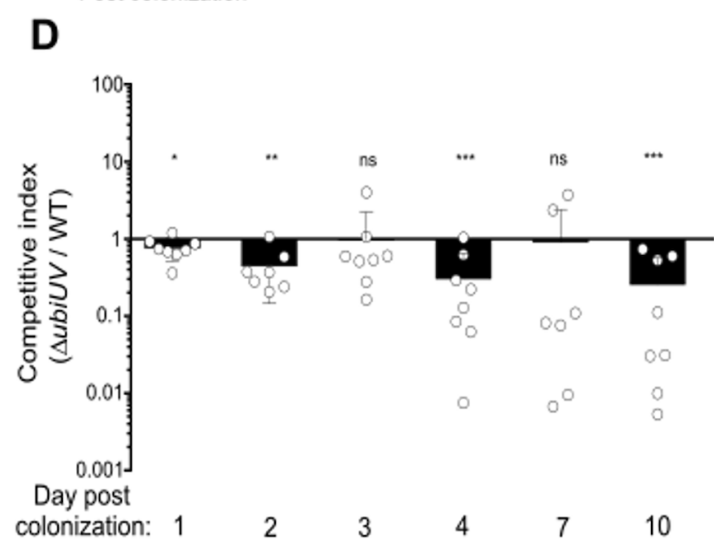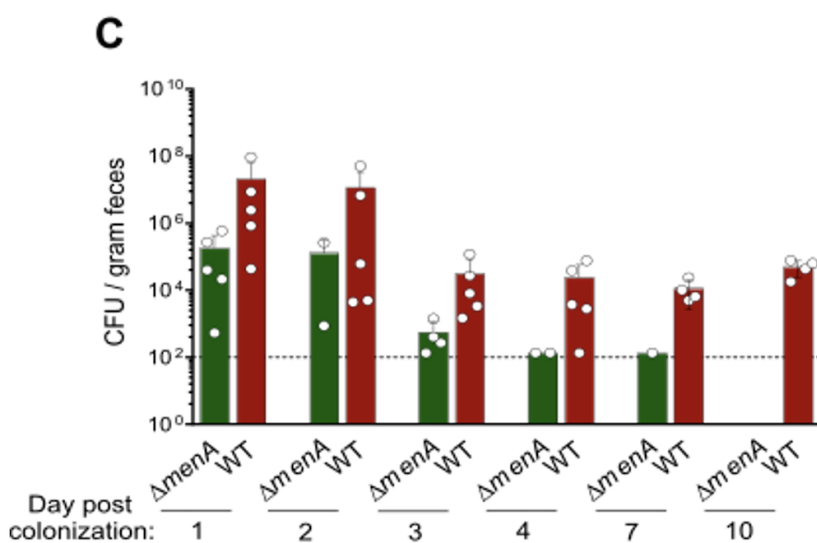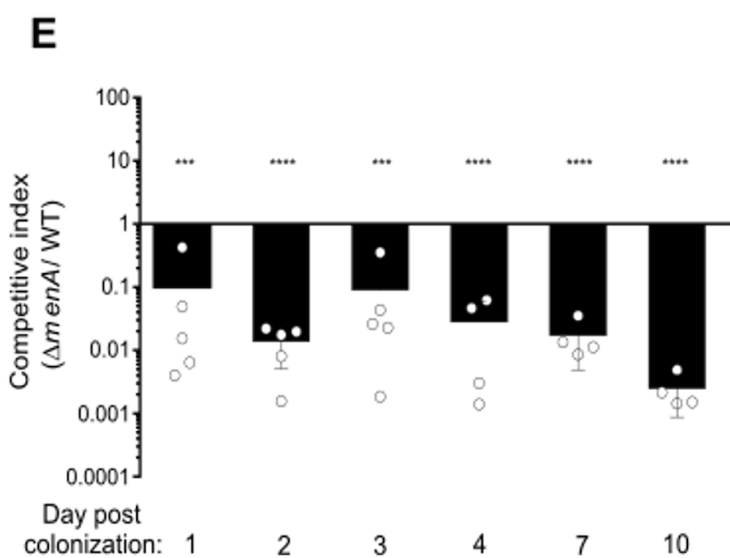



**A**

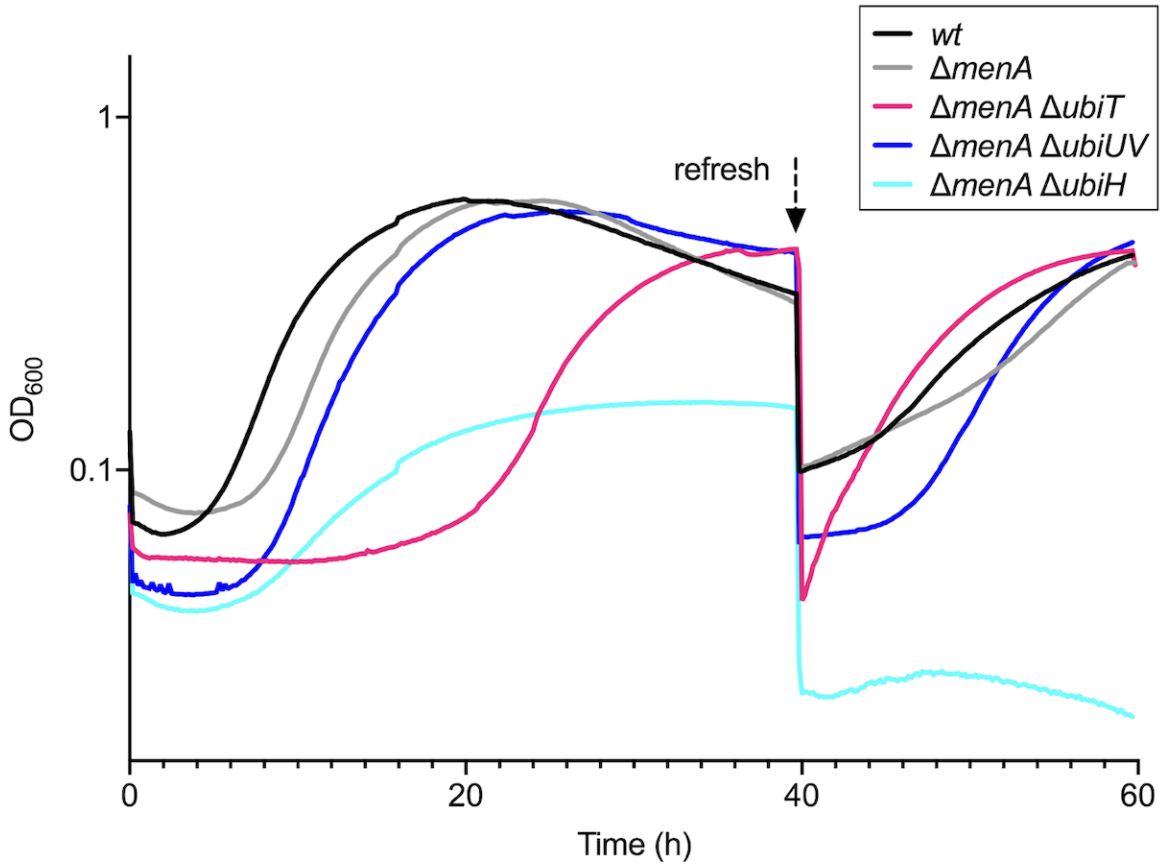

**B**

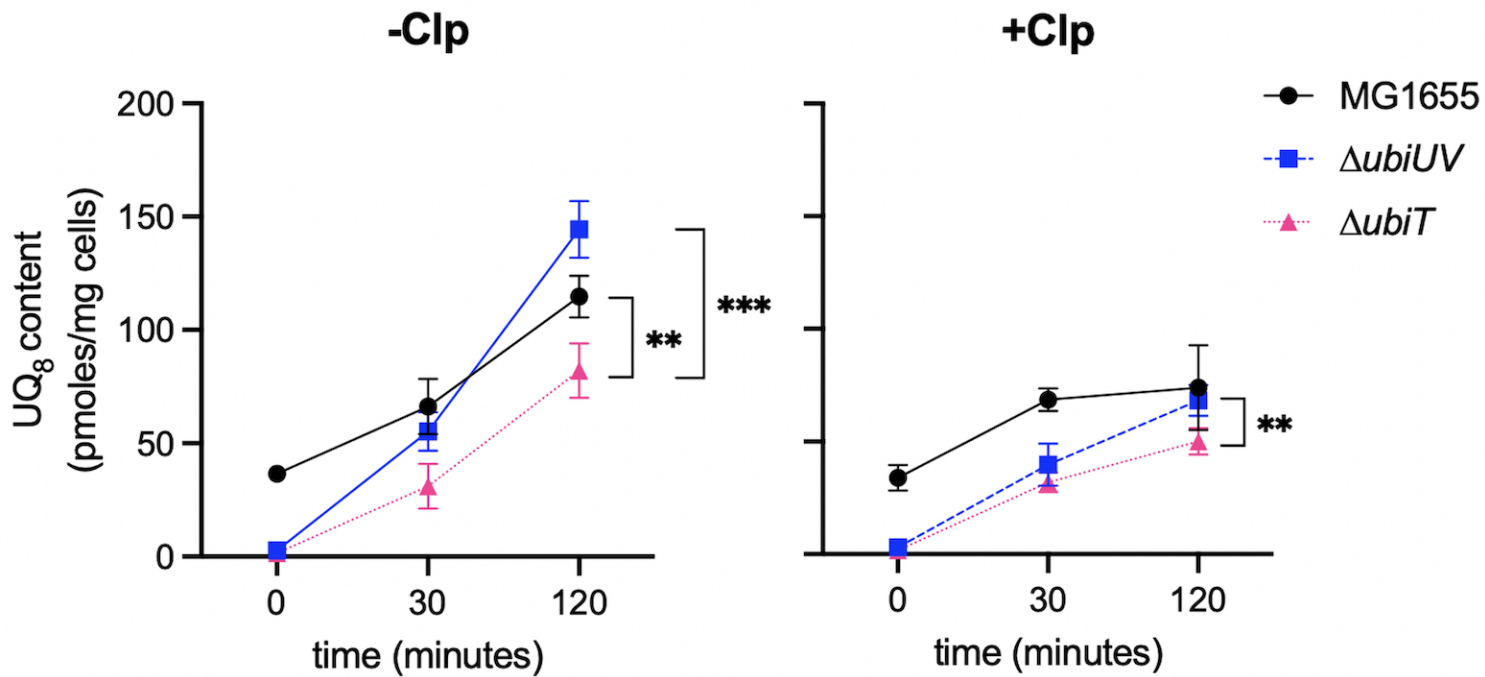

Source: https://www.biorxiv.org/content/10.1101/2023.03.15.532739v1.full.pdf
